# Ipsilateral stimulus encoding in primary and secondary somatosensory cortex of awake mice

Aurélie Pala<sup>1</sup> and Garrett B. Stanley<sup>1</sup>

<sup>1</sup>Wallace H. Coulter Department of Biomedical Engineering, Georgia Institute of Technology and Emory University, Atlanta, GA, 30332, USA.

Abbreviated title: Ipsilateral stimulus encoding in somatosensory cortices.

Correspondence should be addressed to Aurélie Pala at [aurelie.pala@gmail.com](mailto:aurelie.pala@gmail.com).

8 figures, 2 tables

Abstract: 188/250 words, Introduction: 649/650 words, Discussion: 1500/1500 words.

The authors declare no competing financial interests.

Acknowledgements: This work was supported by the Swiss National Science Foundation postdoctoral fellowships P2ELP3\_168506 and P300PA\_177861 (AP), the National Institute of Neurological Disorders and Stroke BRAIN Grant R01NS104928 (GBS), and the National Institute of Neurological Disorders and Stroke Grant R21NS112783 (AP and GBS). We thank Bilal Haider for sharing the Scnn1a-Tg3-Cre x LSL-ChR2 mice and for insightful feedback on the manuscript, Audrey Sederberg for valuable suggestions about the classifier-based analyses, and other members of the Stanley laboratory for helpful discussions.

## 27 **Abstract**

28           Lateralization is a hallmark of somatosensory processing in the mammalian brain.  
29 However, in addition to their contralateral representation, unilateral tactile stimuli also  
30 modulate neuronal activity in somatosensory cortices of the ipsilateral hemisphere. The  
31 cellular organization and functional role of these ipsilateral stimulus responses in awake  
32 somatosensory cortices, especially regarding stimulus coding, are unknown. Here, we  
33 targeted silicon probe recordings to the vibrissa region of primary (S1) and secondary  
34 (S2) somatosensory cortex of awake head-fixed mice of either sex while delivering  
35 ipsilateral and contralateral whisker stimuli. Ipsilateral stimuli drove larger and more  
36 reliable responses in S2 than in S1, and activated a larger fraction of stimulus-responsive  
37 neurons. Ipsilateral stimulus-responsive neurons were rare in layer 4 of S1, but were  
38 located in equal proportion across all layers in S2. Linear classifier analyses further  
39 revealed that decoding of the ipsilateral stimulus was more accurate in S2 than S1, while  
40 S1 decoded contralateral stimuli most accurately. These results reveal substantial  
41 encoding of ipsilateral stimuli in S1 and especially S2, consistent with the hypothesis that  
42 higher cortical areas may integrate tactile inputs across larger portions of space,  
43 spanning both sides of the body.

44

45

## 46 **Significance Statement**

47 Tactile information obtained by one side of the body is represented in the activity of  
48 neurons of the opposite brain hemisphere. However unilateral tactile stimulation also  
49 modulates neuronal activity in the other, or ipsilateral, brain hemisphere. This ipsilateral  
50 activity may play an important role in the representation and processing of tactile  
51 information, in particular when the sense of touch involves both sides of the body. Our

52 work in the whisker system of awake mice reveals that neocortical ipsilateral activity, in  
53 particular that of deep layer excitatory neurons of secondary somatosensory cortex (S2),  
54 contains information about the presence and the velocity of unilateral tactile stimuli,  
55 which supports a key role for S2 in integrating tactile information across both body sides.

56

57

## 58 **Introduction**

59 Most studies of somatosensation concentrate on a single cerebral hemisphere  
60 and examine the neocortical representations of tactile signals arising from the opposite,  
61 or contralateral, side of the body. However, across species, ipsilateral tactile stimuli  
62 have also been shown to evoke changes in population activity of primary (S1) and  
63 secondary (S2) somatosensory cortex (Pidoux and Verley 1979, Tommerdahl et al.  
64 2005, Hlushchuk and Hari 2006, Lipton et al. 2006, Ferezou et al. 2007, Eickhoff et al.  
65 2008, Plomp et al. 2017, Song et al. 2018), mainly mediated by corticocortical  
66 projections via the corpus callosum (Pidoux and Verley 1979, Picard et al. 1990, Fabri  
67 et al. 1999). Yet, surprisingly little is known about the cellular-level specificity of  
68 ipsilateral stimulus-evoked activity in S1 and S2, and about its potential role in the  
69 neocortical encoding of tactile information during awake somatosensation.

70 Previous studies of ipsilateral activity in somatosensory cortices have focused on  
71 putative excitatory neurons, revealing sensory responses distinct from contralateral  
72 ones. Ipsilateral stimulation of the hand in macaque monkeys and of the whiskers in  
73 rodents primarily elicited increased spiking in subsets of putative excitatory neurons in  
74 S1 (in area 2 in monkeys) (Iwamura et al. 1994, Iwamura et al. 2001, Shuler et al. 2001,  
75 Wiest et al. 2005) and S2 (Carvell and Simons 1986, Burton et al. 1998, Iwamura et al.  
76 2001, Taoka et al. 2016). These sensory responses were typically smaller, sparser, and

77 exhibited longer onset latency than sensory responses evoked by contralateral stimuli.  
78 In comparison, GABAergic neuron responses to ipsilateral tactile stimuli have not been  
79 investigated (but see Palmer et al. 2012), even though fast-spiking (FS) GABAergic  
80 neurons have been shown to receive interhemispheric callosal inputs in vitro (Petreanu  
81 et al. 2007, Karayannis et al. 2007, Rock and Apicella 2015) and in vivo (Cisse et al.  
82 2003, Cisse et al. 2007) in multiple neocortical areas.

83 Separately, anatomical studies have revealed differences in the density of callosal  
84 axon terminals as a function of the neocortical lamina they innervate in both S1 and S2  
85 (Wise 1975, Wise and Jones 1976, Akers and Killackey 1978, Sloper and Powell 1979,  
86 Petreanu et al. 2007). Yet, whether sensory responses evoked by ipsilateral stimuli  
87 exhibit laminar-specific organization potentially suggestive of an intracortical subnetwork  
88 dedicated to ipsilateral tactile information processing is completely unexplored.

89 In addition to its cellular organization, a major unknown pertaining to S1 and S2  
90 activity relates to its role in ipsilateral stimulus coding. Whether changes in population  
91 spiking enable the decoding of ipsilateral tactile stimuli, and whether this differs in S1  
92 and S2, is totally unknown. Previous studies on the encoding of contralateral whisker  
93 stimuli have revealed that the spike rate of single neurons and of populations of neurons  
94 in the vibrissa region of S1 and of S2 support the prediction of the stimulus occurrence,  
95 or its detection (Wang et al. 2010, Adibi and Arabzadeh 2011, Kwon et al. 2016). S1  
96 spikes are also known to encode contralateral stimulus properties, for instance enabling  
97 the discrimination between whisker deflections of different amplitudes (Adibi and  
98 Arabzadeh 2011), different velocities (Wang et al. 2010), and of different temporal  
99 profiles (Arabzadeh et al. 2006, McGuire et al. 2016). To what extent ipsilateral stimuli  
100 can be detected and discriminated from S1 and S2 activity, given that they elicit weaker,  
101 sparser and delayed changes in spiking, is uncertain.

102           Here, we reveal substantial representation of ipsilateral stimuli in the neural  
103 activity of awake S1 and especially S2. We first show that ipsilateral stimuli evoke larger  
104 and more reliable sensory responses in a larger fraction of putative excitatory neurons  
105 (Regular-Spiking, RS) and FS inhibitory neurons, with less laminar specificity in S2  
106 compared to S1. Then, we reveal that increased and decreased RS spiking in both S1  
107 and S2 enables ipsilateral stimulus detection and stimulus velocity discrimination, with  
108 S2 spiking showing higher ipsilateral stimulus detectability and discriminability. These  
109 results suggest that S2 may be key in integrating both contralateral and ipsilateral tactile  
110 signals.

111

112

## 113 **Materials and Methods**

### 114 **Animals, headpost implantation, and habituation to head restraint**

115           Thirteen 8-26 week old C57BL/6J male mice, one 11 week old male and one 12  
116 week old female Scnn1a-Tg3-Cre (Madisen et al. 2010) mouse crossed with CAG-LSL-  
117 ChR2(H134R)-EYFP mice (LSL-ChR2) (Madisen et al. 2010) were used in accordance  
118 with protocols approved by the Georgia Institute of Technology Institutional Animal Care  
119 and Use Committee and in agreement with guidelines established by the National  
120 Institutes of Health. Mice were housed in groups of two individuals (minimum) under a  
121 reversed light-dark cycle. Mice were implanted with a custom-made headpost and a  
122 recording chamber under 1-1.5% isoflurane anesthesia. After minimum 3 days of  
123 recovery, mice were gradually habituated to head fixation, paw restraint, and whisker  
124 stimulation for 3-6 days before proceeding to electrophysiological recordings.

125

### 126 **Identification and verification of recording location**

127 Primary (S1) and secondary (S2) somatosensory cortex recording locations were  
128 functionally identified via intrinsic signal optical imaging (ISOI) performed through a  
129 thinned skull under 1-1.25% isoflurane anesthesia (Yamashita et al. 2013, Masino et  
130 al.1993). S1 and S2 recordings were mainly targeted to areas corresponding to the B1  
131 and B2 whiskers (18 S1 recordings in total: B1 whisker: 10 recordings, B2 whisker: 2  
132 recordings, C1 whisker: 3 recordings, C2 whisker: 1 recording, D2 whisker: 2 recordings  
133 / 20 S2 recordings in total: B1 whisker: 14 recordings, C1 whisker: 3 recordings, C2  
134 whisker: 3 recordings). We pooled the data obtained from recordings targeted to areas  
135 corresponding to different whiskers, since these did not differ in the fraction of ipsilateral  
136 stimulus-responsive RS neurons, nor in the RS neuron change in spiking evoked by  
137 ipsilateral stimuli in either S1 and S2. Additionally, we verified the precise location and  
138 the insertion angle and depth of the silicon probes by imaging the fluorescent probe tracks  
139 in fixed brain slices stained to highlight layer 4 across S1 and S2. In brief, after the last  
140 recording, mice were transcardially perfused with 1x PBS (137 mM NaCl, 2.7 mM KCl,  
141 and 10 mM phosphate buffer, VWR), followed by 4% paraformaldehyde. The brains were  
142 extracted and post-fixed for a maximum of 2 hours in the 4% paraformaldehyde solution  
143 before being sectioned in 100 um thick coronal slices on a vibratome. The brain slices  
144 were stained for cytochrome oxidase activity to highlight the location of S1 barrel cortex  
145 (Wong-Riley and Welt 1980) and of S2 layer 4, before being further incubated with DAPI  
146 (2  $\mu$ M in PBS) for 15 minutes, mounted on slides with Fluoromount, and imaged using a  
147 confocal microscope.

148

### 149 **Silicon probe recordings**

150 Mice were anesthetized (1-1.5% isoflurane anesthesia), and a small craniotomy  
151 was made above the left hemisphere at the exact location previously determined by ISOI

152 (see above) leaving the dura intact. The craniotomy was then covered with silicone  
153 elastomer (Kwik-Cast, WPI) and mice were returned to their home cage for at least 2  
154 hours to recover from anesthesia. In a subset of mice, recordings were conducted in the  
155 same craniotomy across two consecutive days. Mice were placed on the recording setup,  
156 the silicone elastomer removed, and a 32-channel laminar silicon probe (A1x32-5mm-25-  
157 177-A32, 25  $\mu\text{m}$  inter-channel spacing, Neuronexus) was slowly inserted through the dura  
158 using a micromanipulator (Luigs & Neumann) to a target depth of 1000-1100  $\mu\text{m}$ . The  
159 probe insertion angle was 35° from the vertical for S1 recordings, and 55° for S2  
160 recordings. All silicon probes were electrochemically plated with a poly(3,4-  
161 ethylenedioxythiophene) (PEDOT) polymer (Wilks et al. 2009, Ludwig et al. 2011) using  
162 a NanoZ device (White Matter LLC) to reach 1 kHz impedance values between 0.2 and  
163 0.5 M $\Omega$ . Silicon probes were then coated with Dil (0.2 mg/ml in ethanol) (Invitrogen) to be  
164 able to visualize their fluorescent track in fixed tissue after the termination of the  
165 recordings (see above). Once the silicon probe was lowered to its target depth, a drop of  
166 agarose gel (2% in Ringer solution) (Sigma) was applied on top of the craniotomy to  
167 minimize movements and prevent drying of the recording site, followed by a drop of  
168 mineral oil to prevent drying of the agarose. Data collection started after a minimum of 30  
169 minutes to allow for relaxation of the brain tissue. Continuous signals were filtered (1st-  
170 order high-pass at 0.3 Hz and 3rd-order low-pass at 7.5 kHz) and digitized at 30 kHz  
171 using a 128-channel Cerebus system (Blackrock Microsystems).

172

### 173 **Whisker stimulation**

174 All but three whiskers from distinct rows on each side of the face were trimmed at  
175 their base. The left and right whiskers corresponding to the recorded region of S1 or S2  
176 were threaded into narrow 1.5 cm long extension tubes glued to high-precision

177 galvanometer-operated stimulators (Cambridge Technologies) under the control of  
178 custom routines written in MATLAB and Simulink Real-Time (Mathworks) with 1 ms  
179 temporal resolution. The other four whiskers (two on each side of the face) were imaged  
180 to identify epochs of whisker stillness (see below). The extension tubes were positioned  
181 approximately 5 mm away from the face and aligned with the whisker natural resting  
182 orientations. Whiskers were deflected in the caudo-rostral direction following a sawtooth-  
183 shaped spatiotemporal profile (Wang et al. 2010). The rise and decay times of the  
184 sawtooth waveform were 8 ms, and deflection velocity was calculated as the average  
185 velocity across the whole waveform duration (16 ms). Left and right whiskers were  
186 randomly stimulated with a minimum of 2 s between consecutive stimuli.

187

### 188 **Whisker movement videography and identification of epochs of “Whisker** 189 **stillness”.**

190 For most recordings, videography was acquired for two non-trimmed whiskers on  
191 each side of the face (see above) at 200 Hz with a resolution of 14.4 pixels/mm (EoSens  
192 CL MC1362, Mikrotron), while in a subset of recordings, whisker videography was  
193 acquired at 25 Hz with a resolution of 6.8 pixels/mm (HQCAM), under infrared  
194 illumination. The identification of epochs of whisker stillness and of whisking was done  
195 using custom routines written in MATLAB (MathWorks). In brief, the movie pixel grayscale  
196 values were first inverted such that the whiskers appeared white on a darker background.  
197 Then, one region of interest (ROI) was manually delineated on each side of the face, and  
198 the absolute across-frames variation of the normalized sum of the pixel values within each  
199 ROI was calculated and then summed across the two ROIs. The obtained time series  
200 was then smoothed and individual time points with values lower than a fixed threshold  
201 were labeled as “Whisker stillness”. “Whisker stillness” epochs shorter than 25 ms (5



202 frames at 200 Hz) were removed from the “Whisker stillness” category.

203

#### 204 **Layer 4 depth estimation in Scnn1a-Tg3-Cre x LSL-ChR2 mice**

205 To confirm the accuracy of our functional laminar estimation (see below), we  
206 performed two S1 and four S2 recordings in two Scnn1a-Tg3-Cre mice crossed with CAG-  
207 LSL-ChR2(H134R)-EYFP mice, which express the Channelrhodopsin-2 protein (ChR2)  
208 in layer 4 excitatory neurons of S1 and S2 (Madisen et al. 2010, Pluta et al. 2015,  
209 Minamisawa et al. 2018). ChR2 excitation was achieved with a 470 nm LED (Thorlabs)  
210 coupled to a 400  $\mu\text{m}$  diameter optic fiber (Thorlabs) placed immediately above the  
211 craniotomy. The pattern of light stimulation was a train of square light pulses of 3 ms  
212 duration and 19.1  $\text{mW}/\text{mm}^2$  intensity delivered with a minimum of 1 s inter-pulse interval.  
213 The center of L4 was assigned to the silicon probe channel fulfilling the largest number  
214 of the following four criteria: 1) time of peak of the light-evoked local field potential (LFP)  
215 response within 2 % of the fastest peak time across all 32 channels, 2) peak amplitude of  
216 the light-evoked LFP response within 95 % of the largest peak amplitude across all 32  
217 channels, 3) sink peak times of the current source density (CSD) analysis of the light-  
218 evoked LFP response within twice the fastest CSD sink peak time across all 32 channels,  
219 and 4) sink onset in the CSD within twice the fastest CSD sink onset time across all 32  
220 channels (Sofroniew et al. 2015). Details regarding the LFP and CSD stimulus-evoked  
221 response calculations are described below as they are similar for the responses evoked  
222 by light and whisker stimuli. The identity of the silicon probe channel assigned to the  
223 center of L4 was then compared to that obtained using our sensory response-based  
224 method (see below).

225

#### 226 **Electrophysiology data analysis**

227 All electrophysiology data analyses were conducted in MATLAB (MathWorks).

## 228 Spike sorting and identification of single-unit clusters

229 Individual recording sweeps were band-passed filtered (forward and reverse, 4<sup>th</sup>  
230 order Butterworth filter, cutoff frequencies of 500 Hz and 14.25 kHz) and concatenated  
231 before proceeding to automated spike sorting using Kilosort2 (Pachitariu et al. 2016) and  
232 manual curation of the spike clusters using Phy (Rossant and Harris 2013).

233 Spike clusters were assigned to the channel with the largest trough-to-peak  
234 amplitude (Voltage Trough-to-Peak, VTP), measured on the cluster average spike  
235 waveform. Spike clusters were considered as single-unit if they met the following six  
236 criteria: 1) more than 500 individual spikes in the cluster, 2) signal-to-noise (SNR) ratio of  
237 the average spike waveform larger than 5. SNR was defined as the ratio between the  
238 trough-to-peak amplitude and the mean standard deviation across the entire duration (3  
239 ms) of the waveform, 3) coefficient of variation (CV) across the whole recording duration  
240 of the VTP averaged over 120 s windows smaller than 0.2, 4) CV across the whole  
241 recording duration of the spiking rate averaged over 120 s windows smaller than 1, 5)  
242 fraction of inter-spike intervals shorter than 2 ms, or refractory period violations, smaller  
243 than 1% (Fee et al. 1996, Hill et al. 2011), 6) cluster isolation distance larger than 55.  
244 Isolation distance was calculated as the Mahalanobis distance between the  $n^{\text{th}}$  closest  
245 non-cluster spike waveform to the cluster spike waveforms, with  $n$  being the number of  
246 spikes in the cluster (Harris et al. 2001). Each cluster and non-cluster spike waveform  
247 were described using the first three principal components across all channels. The single-  
248 unit clusters included in subsequent analyses contained on average  $31108 \pm 40622$   
249 spikes (mean  $\pm$  SD), had a SNR of  $8.0 \pm 2.7$ , a VTP CV of  $0.069 \pm 0.041$ , a spike rate CV  
250 of  $0.39 \pm 0.18$ , a fraction of refractory period violations of  $0.17 \% \pm 0.20 \%$ , and an isolation  
251 distance of  $93 \pm 81$ . On average, 27 single-unit clusters were isolated per recording.

252 Regular Spiking (RS) putative excitatory neurons were distinguished from fast-  
253 spiking (FS) putative inhibitory neurons on the basis of the time elapsed from trough to  
254 peak (TtoP) of the average cluster waveform. Clusters with a TtoP value smaller than 0.4  
255 ms were identified as FS neurons, while clusters with TtoP values larger than 0.5 ms were  
256 labeled as RS neurons (Bartho et al. 2004, Sofroniew et al. 2015). Clusters with TtoP  
257 values in the 0.4-0.5 ms range were not included in the analyses. Using such metric and  
258 thresholds, 76% of the single-unit clusters were classified as RS neurons (263 neurons  
259 in S1, 359 neurons in S2) and 21% as FS neurons (74 neurons in S1, 98 neurons in S2).

260

#### 261 Layer 4 and individual neurons depth estimation

262 To estimate the depth of L4 in S1 and S2 recordings we considered the LFP, CSD  
263 and multi-unit (MUA) responses evoked by contralateral whisker stimuli (Sederberg et al.  
264 2019). The average LFP response was obtained by down-sampling to 3 kHz and low-  
265 pass filtering the raw signal (forward and reverse, 200 Hz cutoff frequency). The one-  
266 dimensional CSD was calculated from the second spatial derivative of the average LFP  
267 response (Freeman and Nicholson 1975) with sinks having negative values and sources  
268 positive values. For display, the CSD profiles were interpolated along the depth axis. The  
269 average MUA response was obtained by high-pass filtering (3<sup>rd</sup> order Butterworth filter,  
270 800 Hz cutoff frequency), rectifying and smoothing the raw signal. The center of L4 was  
271 assigned to the silicon probe channel fulfilling the largest number of the following four  
272 criteria (Haslinger et al. 2006, Higley and Contreras 2007, Plomp et al. 2014): 1) LFP  
273 response peak time within 2 % of the fastest LFP peak response time across all 32  
274 channels, 2) LFP response peak amplitude within 95 % of the largest LFP peak response  
275 amplitude across all 32 channels, 3) sink onset in the CSD within 2 % of the fastest CSD  
276 sink onset time across all 32 channels, 4) MUA response onset time within 2 % of the

277 fastest MUA onset response time across all 32 channels. The thickness of layer 4 was  
278 estimated as 200  $\mu\text{m}$  in S1, equivalent to 8 channels on the silicon probe, and 175  $\mu\text{m}$  in  
279 S2, equivalent to 7 channels, according to our own measurements in fixed tissue sections  
280 and consistent with prior studies (Hooks et al. 2011). Individual neuron depth equaled the  
281 depth of the channel to which they were assigned (see above), leading to 5 %, 12 %, and  
282 83 % of S1 RS neurons, and 18 %, 17 %, and 65 % of S2 RS neurons recorded in L2/3,  
283 L4, and L5/6 respectively, matching previously reported proportions in rodent neocortex  
284 (Naka et al. 2019, Horvath et al. 2021).

285

### 286 Sensory response quantification

287 Mean sensory responses were obtained by averaging individual sensory  
288 responses evoked by whisker stimuli occurring during epochs of whisker stillness.  
289 Responses were included in the average only if the 80 ms prior and the 160 ms after the  
290 onset of the whisker stimulus were assigned to the “Whisker stillness” category (see  
291 above). Across recordings, 57 %  $\pm$  12 % (mean  $\pm$  SD, range: 25 % – 78 %) of the stimuli  
292 occurred during epochs of whisker stillness, resulting in 95  $\pm$  37 stimulus trials (mean  $\pm$   
293 SD, range: 23 – 182 trials) used to calculate the mean response evoked by either  
294 ipsilateral or contralateral stimuli.

295 The magnitude of sensory responses was calculated by subtracting the mean  
296 spike rate calculated over a 500 ms window immediately prior to stimulus onset – the  
297 baseline firing rate – from the mean spike rate calculated over a 50 ms window starting  
298 at stimulus onset. The z-scored magnitude was obtained by dividing the mean response  
299 magnitude by the standard deviation of the baseline firing rate across stimulus trials.  
300 Sensory response variability was estimated by calculating the coefficient of variation (CV)  
301 of the response magnitude across stimulus trials, that is by dividing the standard deviation

302 of the response magnitude by the absolute value of the mean response magnitude. The  
303 onset latency of positive and negative sensory responses was defined as the earliest  
304 time-point post stimulus onset for which the baseline-subtracted cumulative PSTH was  
305 above or below a 95% bootstrapped confidence interval on the cumulative baseline  
306 values (Wiest et al. 2005). Only onset latencies shorter than 50 ms were included in the  
307 population analyses.

308 All single-neuron and population PSTHs had a bin size of 1 ms. Population PSTHs  
309 had their overall pre-stimulus baseline spike rate calculated over a 500 ms window  
310 immediately prior to stimulus onset subtracted from every bin value before being  
311 smoothed by convolution with a Gaussian function with 2-ms standard deviation.

312

### 313 Identification of stimulus-responsive neurons

314 A neuron was considered stimulus-responsive if it met two out of the three  
315 following criteria: 1) for a PSTH with 10 ms bin size, at minimum 2 bins within the first 50  
316 ms post-stimulus onset with a value above, or 4 bins with a value below, a 95%  
317 confidence threshold on the pre-stimulus spike rate obtained by bootstrapping, 2) a  
318 bootstrapped 95% confidence interval on the mean response magnitude (see above) that  
319 did not include 0 spikes/sec, 3) different spike count distributions for a post- and a pre-  
320 stimulus epoch of 50 ms duration at a significance level of 0.05 assessed by a one-tailed  
321 Wilcoxon rank-sum test. Further, criteria 1) and 3) determined whether sensory  
322 responses were positive or negative. For evaluating stimulus-responsiveness, responses  
323 to all whisker stimuli, irrespective of the presence or absence of whisker movements at  
324 the time of stimulus delivery, were included in the analysis.

325

### 326 Spike count correlation

327 Spike count correlation (rSC) between pairs of RS neurons was computed as the Pearson  
328 correlation coefficient between the number of spikes occurring in a 50 ms window starting  
329 immediately post stimulus onset for repeated presentations of the stimulus. Only trials  
330 where the stimulus occurred during epochs of whisker stillness were used in the analysis,  
331 and no other trial selection criteria were used. Spike count correlation was computed for  
332 all possible pairs of RS neurons, irrespective of their stimulus responsiveness. To  
333 compare rSC values in S1 and S2, rSCs were converted to z-scores using the Fisher  
334 transformation.

335

### 336 **Linear Discriminant Analysis (LDA) classifiers**

337 To assess the detectability of the 1000 °/s whisker stimuli from S1 and S2 RS  
338 neuron activity, spiking data from 8 S1 and 8 S2 recordings with a minimum of 10  
339 simultaneously recorded RS neurons each and at least 75 stimulus trials occurring during  
340 epochs of whisker stillness (see above) were used. The classifier input population was  
341 either made of all simultaneously recorded RS neurons in a given recording (*within-*  
342 *recording* classifier) (S1:  $22 \pm 4$  RS/rec, median  $\pm$  MAD, range: 14 – 35 RS/rec, S2:  $27 \pm$   
343  $9$  RS/rec, range: 14 – 40 RS/rec), or of a selection of RS neurons randomly sampled  
344 across all S1 or all S2 recordings (*across-recordings* classifier) (selection pool size of 184  
345 RS neurons for S1 and 205 RS neurons for S2). For each neuron, stimulus trials were  
346 partitioned into 10 folds. For the *across-recordings* classifiers, 90 trials were sampled with  
347 replacement from 9 of the folds to create a training set, while 10 trials were sampled with  
348 replacement from the remaining fold to create a testing test. For each “Stim” trial, the  
349 number of spikes occurring in a 50 ms window located immediately post stimulus onset  
350 was used as input to the classifier, while the number of spikes occurring during a similar  
351 duration window located immediately before stimulus onset was used as input to the

352 classifier for the “No Stim” trials. This led to a total of 126 trials (63 “Stim” and 63 “No  
353 Stim”) in the training set and 14 trials (7 “Stim” and 7 “No Stim”) in the testing set for the  
354 *within-recording* classifiers, and 180 training trials (90 “Stim” and 90 “No Stim”) and 20  
355 test trials (10 “Stim” and 10 “No Stim”) for the *across-recordings* classifiers. The LDA  
356 classifier was trained on the trials of the training set using a full covariance matrix for the  
357 *within-recording* classifiers and a diagonal covariance matrix for the *across-recordings*  
358 classifiers, while classification accuracy was evaluated on the testing set. The procedure  
359 was repeated until all folds were used to generate the testing set, and mean classification  
360 accuracy was calculated by averaging classification accuracy values obtained for each of  
361 the 10 distinct testing/training trial partitions. For the *across-recordings* classifiers, the  
362 neuron selection process followed by classifier training and testing according to a 10-fold  
363 cross-validation scheme was repeated 100 times, and the median classification accuracy  
364 with a bootstrapped estimate of the median standard deviation was reported. Chance  
365 level classification accuracies were obtained by randomly shuffling the labels (“Stim” or  
366 “No Stim”) of the trials of the training set.

367       To assess the detectability of the 1000 %/s whisker stimuli from the activity of S1  
368 and S2 RS neurons located in different neocortical layers, the same procedure as  
369 described above for the *across-recordings* classifiers was followed. A random selection  
370 of 10 RS neurons was used as the classifier input population to account for the selection  
371 pool size of each layer (S1: 11 L2/3 RS neurons, 24 L4 RS neurons, 149 L5/6 RS neurons,  
372 S2: 35 L2/3 RS neurons, 34 L4 RS neurons, 135 L5/6 RS neurons).

373       To investigate the contribution of stimulus-responsive neurons with positive and  
374 negative sensory response magnitude to the detectability of 1000 %/s whisker stimuli, we  
375 repeated the same procedure as described above for the *across-recordings* classifiers,  
376 while varying the initial pool from which 24 RS neurons were selected. We chose a



377 classifier input population size of 24 neurons, as it reflected the average number of  
378 simultaneously recorded RS neurons across the 16 S1 and S2 recordings included in the  
379 classification analysis. The S1 pool sizes were 61 S1 RS neurons for stimulus-responsive  
380 neurons (R), 25 RS neurons for stimulus-responsive neurons with positive response  
381 magnitude ( $R > 0$ ), 36 RS neurons for stimulus-responsive neurons with negative response  
382 magnitude ( $R < 0$ ), and 123 RS neurons for non-stimulus-responsive neurons (no R). The  
383 S2 pool sizes were 74 RS neurons (R), 33 RS neurons ( $R > 0$ ), 41 RS neurons ( $R < 0$ ), and  
384 107 RS neurons (no R).

385 To assess the detectability of the 200 °/s whisker stimuli from S1 and S2 RS neuron  
386 activity, 6 S1 and 6 S2 recordings with a minimum of 10 simultaneously recorded RS  
387 neurons and at least 75 stimulus trials occurring during epochs of whisker stillness (see  
388 above) were used to generate a pool of 169 S1 neurons and 144 S2 neurons out of which  
389 the LDA classifiers were built and their performance evaluated as described above for the  
390 *across-recordings* classifier.

391 To assess the discriminability of 200 °/s vs 1000 °/s whisker stimuli from S1 and  
392 S2 RS neuron activity, 3 S1 and 3 S2 recordings with a minimum of 10 simultaneously  
393 recorded RS neurons and at least seventy-five 200 °/s and seventy-five 1000 °/s stimulus  
394 trials occurring during epochs of whisker stillness (see above) were used to generate a  
395 pool of 83 S1 neurons and 77 S2 neurons out of which the LDA classifiers were built  
396 (*across-recordings* classifiers). The procedure to train and evaluate the classifiers was  
397 similar to that used for probing stimulus detectability, except that the inputs to the classifier  
398 were spike counts measured over a 50 ms window immediately post stimulus onset for  
399 both 200 °/s and 1000 °/s trials.

400 All classifier-based analyses were conducted in MATLAB (MathWorks).

401



## 402 **Experimental design and statistical analysis**

403 We carried out non-parametric Wilcoxon rank-sum and Wilcoxon signed-rank tests  
404 to compare the median of two distributions of unpaired and paired samples respectively,  
405 except for comparing spike count correlation distributions, where we used a *t*-test. Chi-  
406 squared tests were used to assess differences between proportions of neurons. LDA  
407 classifier performances were compared using Wilcoxon rank-sum tests. When more than  
408 two comparisons were performed between more than two groups, Bonferroni correction  
409 was used to adjust the significance levels of the statistical tests. A minimum of 1000  
410 bootstrap samples were generated to produce confidence intervals and to estimate the  
411 standard deviation of the median in all analyses involving *across-recordings* classifiers.  
412 All statistical analyses were conducted in MATLAB (MathWorks).

413

## 414 **Data availability**

415 Source data and code to reproduce the analyses and figures can be downloaded from  
416 the Zenodo repository (10.5281/zenodo.5899625).

417

## 418 **Results**

### 419 **S2 neurons exhibit more frequent, larger and less variable sensory responses to** 420 **ipsilateral stimuli.**

421 We performed laminar silicon probe recordings in vibrissa S1 and S2 of the left  
422 hemisphere of awake, head-restrained, mice. We simultaneously measured the spiking  
423 activity of populations of individual putative excitatory neurons (Regular-Spiking, RS)  
424 (Figure 1) and fast-spiking inhibitory neurons (FS) (Figure 2) in response to 1000 °/s  
425 punctate deflections of a single somatotopically-aligned ipsilateral whisker. For  
426 comparison, we applied the same single-whisker stimuli to the somatotopically-aligned

427 contralateral whisker. To avoid any modulation of stimulus-evoked changes in spike rate  
 428 by whisker movements (Fanselow and Nicolelis 1999), we focused all our analyses on  
 429 stimuli delivered when the whiskers were immobile as determined by high-speed  
 430 videography (Figure 1A).

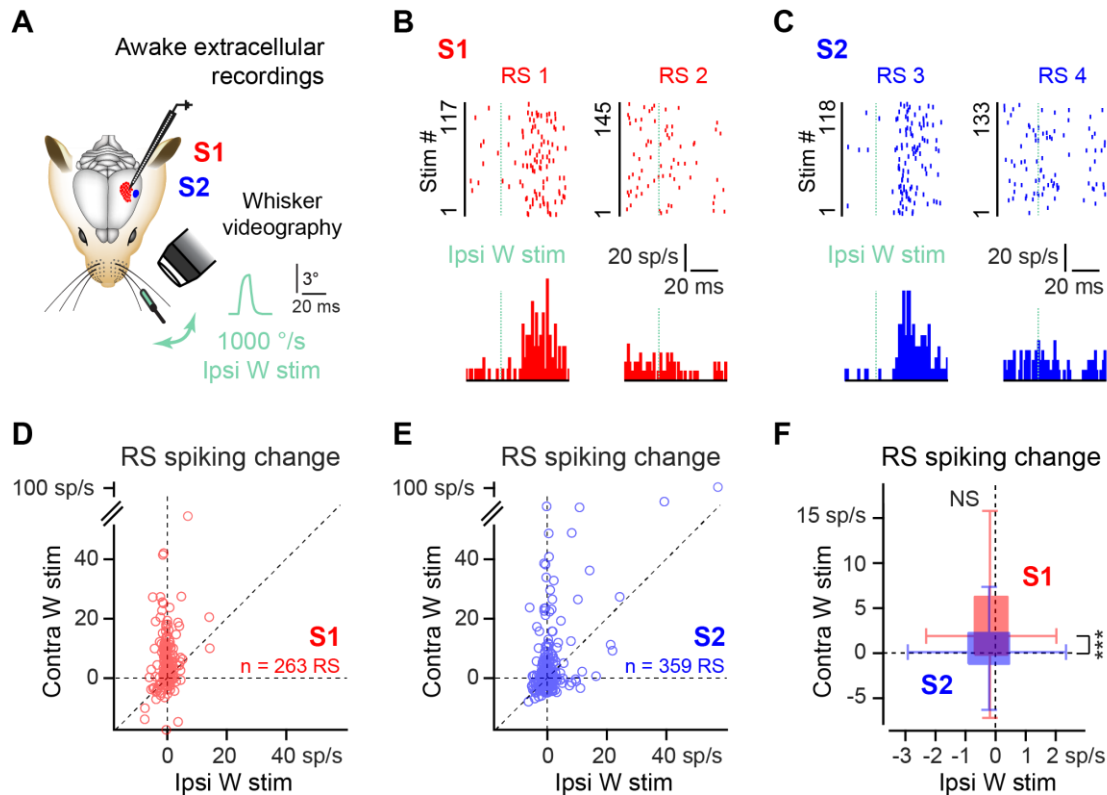

**Figure 1. Change in S1 and S2 RS neuron spiking evoked by ipsilateral whisker stimuli.**

(A) Change in spiking activity evoked by 1000 %/s deflections of the somatotopically-aligned ipsilateral whisker is measured through laminar silicon probe recordings. High-speed videography is used to confirm the absence of whisker movements before and after stimulation. (B) Example spike raster plots and PSTHs for two S1 RS neurons with increased (left) and decreased (right) spiking in response to ipsilateral whisker stimulation. (C) Same as (B), but for two S2 RS neurons. (D) Mean spike rate change evoked in 263 S1 RS neurons by ipsilateral stimuli with corresponding contralateral stimulus-evoked spike rate change. (E) Same as (D) for 359 S2 RS neurons. (F) Ipsilateral stimuli elicit a decrease in spike rate of comparable amplitude in S1 and S2 RS neurons (S1:  $-0.19 \pm 0.55$  spikes/s (n=263), median  $\pm$  MAD,  $p = 0.0013$ , two-sided sign test, S2:  $-0.22 \pm 0.69$  spikes/s (n=359),  $p = 5.23 \cdot 10^{-5}$ , S1 vs S2:  $p = 0.68$ , two-sided Wilcoxon rank-sum test). Contralateral stimuli elicit a larger change in spike rate in S1 RS neurons compared to S2 RS neurons (S1:  $1.48 \pm 2.50$  spikes/s (n=263), median  $\pm$  MAD,  $p = 1.22 \cdot 10^{-10}$ , two-sided sign test, S2:  $0.11 \pm 1.61$  spikes/s (n=359),  $p = 0.40$ , S1 vs S2:  $p = 1.02 \cdot 10^{-6}$ , two-sided Wilcoxon rank-sum test). NS  $p \geq 0.05$ , \*\*  $p < 0.01$ , \*\*\*  $p < 0.001$ .

432 First, we characterized the effect of stimulating the ipsilateral whisker on the  
433 spiking activity of RS neurons of S1 and S2. Ipsilateral stimuli drove both increases and  
434 decreases in RS neuron spiking relative to ongoing activity in S1 (Figure 1B) and S2  
435 (Figure 1C), resulting in heterogenous effects across S1 and S2 RS neuron populations  
436 (Figure 1D, E). Overall, ipsilateral stimuli elicited a small but significant reduction in RS  
437 neuron spike rate in both S1 and S2 (S1:  $-0.19 \pm 0.55$  spikes/s ( $n=263$ ), median  $\pm$  MAD,  
438  $p = 0.0013$ , two-sided sign test, S2:  $-0.22 \pm 0.69$  spikes/s ( $n=359$ ),  $p = 5.23 \cdot 10^{-5}$ ), with no  
439 difference in magnitude between the two regions ( $p = 0.68$ , two-sided Wilcoxon rank-sum  
440 test) (Figure 1F). In comparison, and as expected, deflections of the contralateral whisker  
441 at the same velocity led to a notable increase in RS neuron spike rate in S1 that was  
442 significantly larger than in S2 (Figure 1F).

443 Contrary to the observations in RS neurons, ipsilateral stimuli mainly induced  
444 increased spiking in individual FS neurons (Figure 2A, see Materials and Methods) of S1  
445 and S2 (Figure 2B-D), resulting in an overall positive change in FS neuron spike rate, of  
446 comparable magnitude across S1 and S2 (Figure 2E). Contralateral stimuli also elicited  
447 an increase in spike rate in both S1 and S2 FS neurons, but of much larger magnitude  
448 than the change in spiking evoked by ipsilateral stimuli (Figure 2C-E). A marked  
449 difference between S1 and S2 was the larger proportion of ipsilateral stimulus-responsive  
450 RS and FS neurons in S2 compared to S1 (RS: S1: 31 % (82/263), S2: 39 % (140/359),  
451  $p = 0.0443$ , chi-squared test, FS: S1: 36 % (27/74), S2: 64 % (63/98),  $p = 0.00030$ ). This  
452 was opposite to contralateral stimulus-responsive RS and FS neurons, which were more  
453 numerous in S1 than S2 (RS: S1: 85 % (223/263), S2: 71 % (256/359),  $p = 7.90 \cdot 10^{-5}$ , chi-  
454 squared test, FS: S1: 99 % (73/74), S2: 89 % (87/98),  $p = 0.012$ ) (Table 1). Interestingly,  
455 amongst the population of ipsilateral stimulus-responsive RS neurons we found an equal  
456 proportion of neurons with positive ( $R>0$ ) and negative ( $R<0$ ) response magnitudes (S1:

457 R>0: 44 % (36/82), R<0: 56 % (46/82),  $p = 0.12$ , chi-squared test, S2: R>0: 46 % (65/140),  
 458 R<0: 54 % (75/140),  $p=0.23$ ), whereas contralateral stimuli drove mainly positive RS  
 459 neuron responses; further, FS neuron responses to either ipsilateral or contralateral  
 460 stimuli were predominantly positive (Table 1).

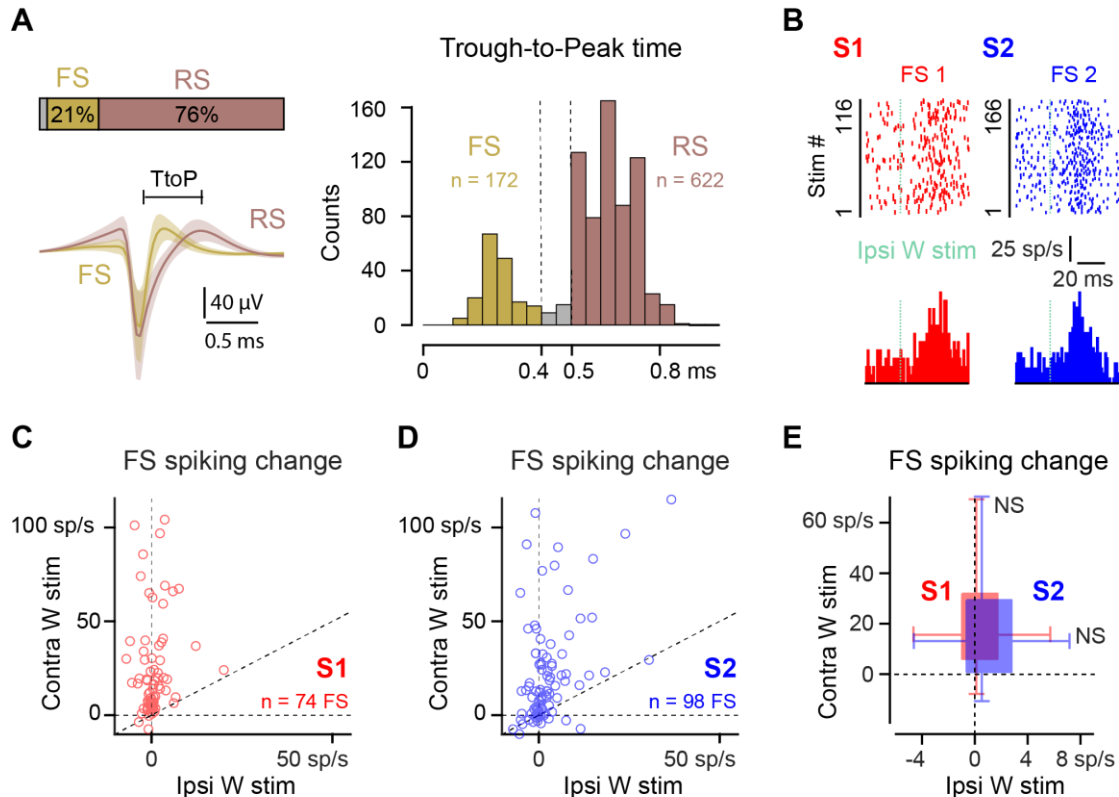

**Figure 2. Change in S1 and S2 FS neuron spiking evoked by ipsilateral whisker stimuli.**

(A) FS neurons are identified by a spike waveform Trough-to-Peak (TtoP) time shorter than 0.4 ms. and RS neurons by a TtoP longer than 0.5 ms. (B) Example spike raster plots and PSTHs for one S1 (red) and one S2 (blue) FS neuron with increased spiking in response to ipsilateral whisker stimulation. (C) Mean spike rate change evoked in 74 S1 FS neurons by ipsilateral stimuli with corresponding contralateral stimulus-evoked spike rate change. (D) Same as (C) for 98 S2 FS neurons. (E) Ipsilateral stimuli elicit an increase in spike rate in S2 FS neurons (S1:  $0.11 \pm 1.29$  spikes/s ( $n=74$ ), median  $\pm$  MAD,  $p = 0.48$ , two-sided sign test, S2:  $0.61 \pm 1.72$  spikes/s ( $n=98$ ),  $p = 0.032$ , S1 vs S2:  $p = 0.098$ , two-sided Wilcoxon rank-sum test). Contralateral stimuli elicit an increase in spike rate of similar amplitude in S1 and S2 FS neurons (S1:  $14.84 \pm 10.29$  spikes/s ( $n=74$ ), median  $\pm$  MAD,  $p = 7.16 \cdot 10^{-18}$ , two-sided sign test, S2:  $12.49 \pm 12.51$  spikes/s ( $n=98$ ),  $p = 2.87 \cdot 10^{-9}$ , S1 vs S2:  $p = 0.12$ , two-sided Wilcoxon rank-sum test). NS  $p \geq 0.05$ , \*  $p < 0.05$ , \*\*\*  $p < 0.001$ .

461 We thus further examined ipsilateral responses across S1 and S2 by separating  
 462 positive (Figure 3A) and negative (Figure 3E) stimulus-responsive RS neurons (Table 1).

|           |                       | <b>Ipsi-responsive RS</b> |                 | <b>Contra-responsive RS</b> |                 |
|-----------|-----------------------|---------------------------|-----------------|-----------------------------|-----------------|
|           |                       | <b>R &gt; 0</b>           | <b>R &lt; 0</b> | <b>R &gt; 0</b>             | <b>R &lt; 0</b> |
| <b>S1</b> | Proportion of neurons | 31% (82/263)              |                 | 85% (223/263)               |                 |
|           |                       | 44% (36/82)               | 56% (46/82)     | 83% (184/223)               | 17% (39/223)    |
|           | Z-scored magnitude    | 0.51 ± 0.20               | -0.36 ± 0.13    | 1.62 ± 1.06                 | -0.47 ± 0.20    |
|           | Variability (CV)      | 5.86 ± 2.58               | 4.25 ± 1.69     | 2.57 ± 1.37                 | 3.11 ± 1.23     |
|           | Onset latency (ms)    | 22.0 ± 7.5                | 19.0 ± 11.0     | 8.7 ± 1.7                   | 25.0 ± 7.0      |
| <b>S2</b> | Proportion of neurons | 39% (140/359)             |                 | 71% (256/359)               |                 |
|           |                       | 46% (65/140)              | 54% (75/140)    | 68% (173/256)               | 32% (83/256)    |
|           | Z-scored magnitude    | 1.06 ± 0.64               | -0.40 ± 0.15    | 1.30 ± 1.05                 | -0.49 ± 0.16    |
|           | Variability (CV)      | 4.14 ± 2.14               | 3.59 ± 1.35     | 3.25 ± 2.08                 | 2.79 ± 0.84     |
|           | Onset latency (ms)    | 16.8 ± 4.2                | 25.0 ± 13.0     | 11.0 ± 2.0                  | 23.0 ± 8.5      |
|           |                       | <b>Ipsi-responsive FS</b> |                 | <b>Contra-responsive FS</b> |                 |
|           |                       | <b>R &gt; 0</b>           | <b>R &lt; 0</b> | <b>R &gt; 0</b>             | <b>R &lt; 0</b> |
| <b>S1</b> | Proportion of neurons | 36% (27/74)               |                 | 99% (73/74)                 |                 |
|           |                       | 74% (20/27)               | 26% (7/27)      | 100% (73/73)                | 0% (0/73)       |
| <b>S2</b> | Proportion of neurons | 64% (63/98)               |                 | 89% (87/98)                 |                 |
|           |                       | 78% (49/63)               | 22% (14/63)     | 90% (78/87)                 | 10% (9/87)      |

**Table 1: Proportion of stimulus-responsive RS and FS neurons and response properties: 1000 %s stimuli.**

Proportion of RS and FS neurons with a significant response to 1000 %s ipsilateral or contralateral stimuli. Response magnitude (z-score), variability (coefficient of variation, CV), and onset latency are reported as median ± MAD.

463 Positive responses in RS neurons were larger in S2 than S1 (Figure 3B), and a similar  
 464 but non-significant trend was observed for negative responses (Figure 3F). Regardless  
 465 of response sign, response variability for RS neurons was smaller in S2 than S1  
 466 (quantified by the coefficient of variation (CV) of the response magnitude across repeated  
 467 whisker stimulations) (Figure 3C, G) and onset latency was comparable in S1 and S2  
 468 (Figure 3D, H).

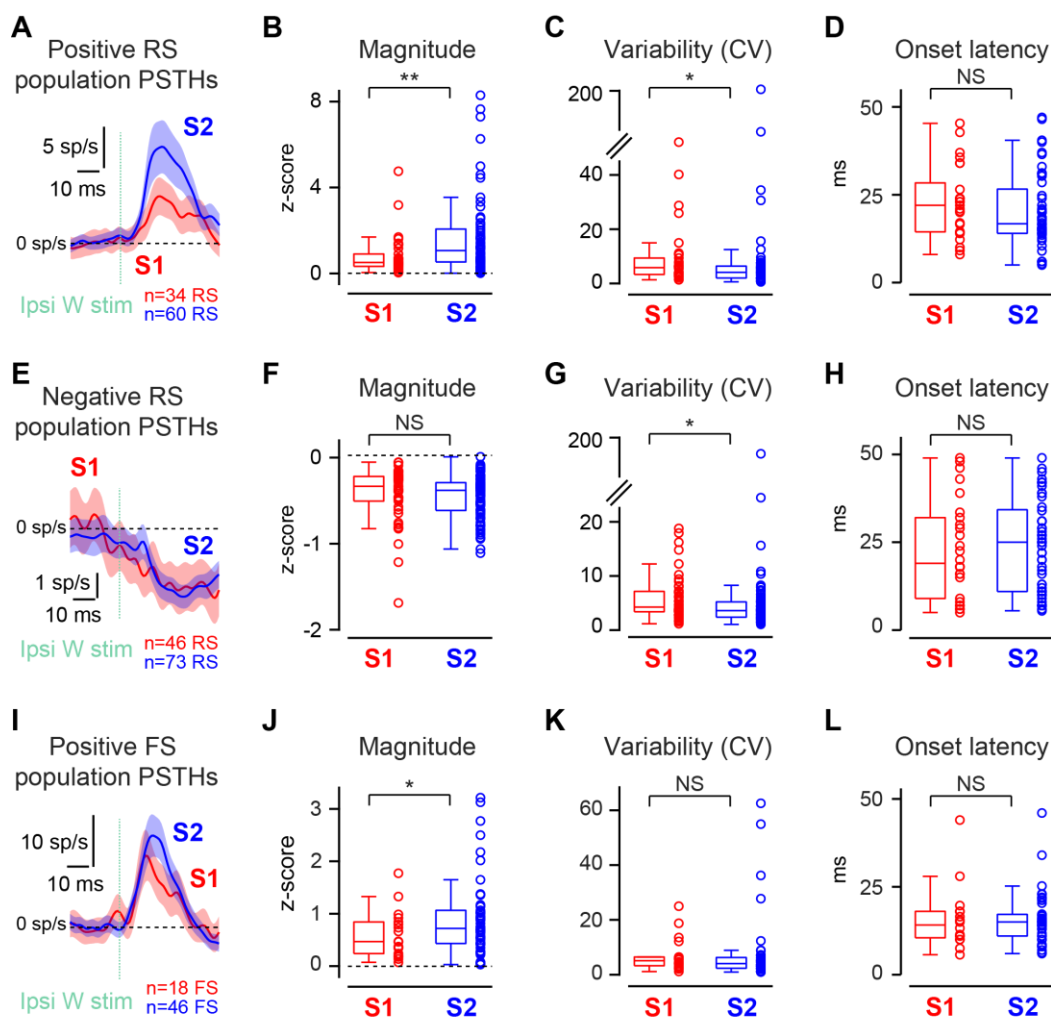

**Figure 3. S2 neurons have larger and less variable responses to ipsilateral stimuli compared to S1 neurons.** (A) Baseline-subtracted population PSTHs for S1 (red) and S2 (blue) RS neurons with positive responses to ipsilateral stimuli. Shaded area represents the SEM. (B) Larger magnitude of positive ipsilateral responses in S2 compared to S1 RS neurons (S1:  $0.51 \pm 0.20$  ( $n=34$ ), S2:  $1.06 \pm 0.64$  ( $n=60$ ), z-score, median  $\pm$  MAD,  $p = 0.0025$ , one-sided Wilcoxon rank-sum test). (C) Smaller trial-to-trial variability of positive ipsilateral responses in S2 compared to S1 RS neurons. Variability is quantified as the coefficient of variation (CV) of the response magnitude (S1:  $5.86 \pm 2.58$  ( $n=34$ ), S2:  $4.14 \pm 2.14$  ( $n=60$ ), median  $\pm$  MAD,  $p = 0.026$ , one-sided Wilcoxon rank-sum test). (D) Comparable onset latency for positive ipsilateral responses in S1 and S2 RS neurons (S1:  $22.0 \pm 7.5$  ms ( $n=25$ ), S2:  $16.8 \pm 4.2$  ms ( $n=48$ ), median  $\pm$  MAD,  $p = 0.11$ , one-sided Wilcoxon rank-sum test). (E) Same as (A), but for RS neurons with negative responses to ipsilateral stimuli. (F) Magnitude of negative ipsilateral responses is comparable in S1 and S2 RS neurons (S1:  $-0.36 \pm 0.13$  ( $n=46$ ), S2:  $-0.40 \pm 0.15$  ( $n=73$ ), z-score, median  $\pm$  MAD,  $p = 0.079$ , one-sided Wilcoxon rank-sum test). (G) Variability of negative ipsilateral responses is smaller in S2 compared to S1 RS neurons (S1:  $4.25 \pm 1.69$  ( $n=46$ ), S2:  $3.59 \pm 1.35$  ( $n=73$ ), median  $\pm$  MAD,  $p = 0.014$ , one-sided Wilcoxon rank-sum test). (H) Comparable onset latency for negative ipsilateral responses in S1 and S2 RS neurons (S1:  $19.0 \pm 11.0$  ms ( $n=26$ ), S2:  $25.0 \pm 13.0$  ms ( $n=49$ ), median  $\pm$  MAD,  $p = 0.31$ , one-sided Wilcoxon rank-sum test). (I) Same as (A), but for FS neurons with positive responses to ipsilateral stimuli. (J) Larger magnitude of positive ipsilateral responses in S2 compared to S1 FS neurons (S1:  $0.47 \pm 0.28$  ( $n=18$ ), S2:  $0.72 \pm 0.30$  ( $n=46$ ), z-score, median  $\pm$  MAD,  $p = 0.048$ , one-sided Wilcoxon rank-sum test). (K) Comparable ipsilateral response variability in S1 and S2 FS neurons. (S1:  $5.10 \pm 1.59$  ( $n=18$ ), S2:  $4.03 \pm 1.67$  ( $n=46$ ), median  $\pm$  MAD,  $p = 0.16$ , one-sided Wilcoxon rank-sum test). (L) Comparable onset latency for positive ipsilateral responses in S1 and S2 FS neurons (S1:  $14.1 \pm 3.9$  ms ( $n=16$ ), S2:  $15.0 \pm 4.0$  ms ( $n=39$ ), median  $\pm$  MAD,  $p = 0.42$ , one-sided Wilcoxon rank-sum test). NS  $p \geq 0.05$ , \*  $p < 0.05$ , \*\*  $p < 0.01$ .

470 Notably, positive ipsilateral responses in S1 and S2 RS neurons had longer onset  
471 latencies than positive responses to contralateral stimuli (S1: Ipsi:  $22.0 \pm 7.5$  ms (n=25),  
472 Contra:  $8.7 \pm 1.7$  ms (n=160), median  $\pm$  MAD,  $p = 1.73 \cdot 10^{-8}$ , two-sided Wilcoxon rank-  
473 sum test, S2: Ipsi:  $16.8 \pm 4.2$  ms (n=48), Contra:  $11.0 \pm 2.0$  ms (n=143),  $p = 6.56 \cdot 10^{-8}$ )  
474 (Table 1), similarly to what was previously reported for putative excitatory neurons of layer  
475 5 in S1 (Shuler et al. 2001, Wiest et al. 2005). FS neurons, which mainly displayed positive  
476 responses to ipsilateral stimuli (Figure 3I) (Table 1), showed significantly larger response  
477 magnitude (Figure 3J) accompanied by smaller yet non-significant response variability  
478 (Figure 3K) in S2 compared to S1, and comparable onset response latency in both areas  
479 (Figure 3L). Taken together, these results show that ipsilateral whisker stimuli elicited  
480 larger and more reliable sensory responses in a larger fraction of RS and FS neurons in  
481 S2 compared to S1, therefore suggesting a more robust representation of the ipsilateral  
482 tactile inputs in S2 than in S1. We next examined layer-specific distributions and response  
483 profiles for ipsilateral stimulus-responsive RS and FS neurons in S1 and S2. We found a  
484 smaller proportion of ipsilateral stimulus-responsive neurons in L4 of S1 as compared to  
485 L2/3 and to L5/6 (Figure 4A, B), while in S2 stimulus-responsive neurons were found in  
486 equal proportions across all layers (Figure 4C, D), consistent with prior anatomical studies  
487 on the laminar location of callosal axon terminals (Wise 1975, Wise and Jones 1976,  
488 Akers and Killackey 1978, Petreanu et al. 2007). However, positive and negative sensory  
489 response magnitude (Figure 4E), variability (Figure 4F), and onset latency (Figure 4G),  
490 in RS and FS neurons were comparable across laminae in both S1 and S2. This suggests  
491 that the representation of the ipsilateral tactile inputs is widely distributed across neurons  
492 of all layers in S2, while in S1, ipsilateral responses spare L4, the main thalamocortical  
493 recipient layer, which may rather be dedicated to representing and processing  
494 contralateral tactile information.



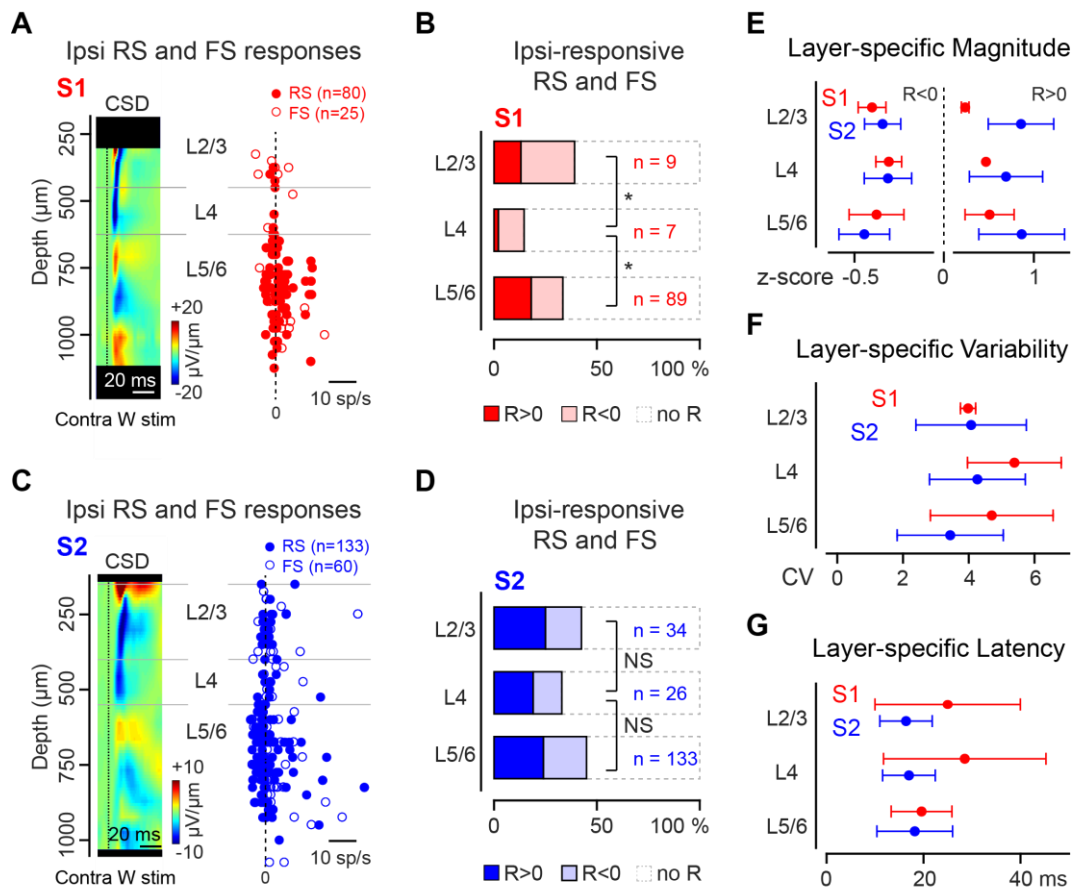

**Figure 4. S2 ipsilateral stimulus-responsive RS and FS neurons are found in all laminae.**

(A) (Right) Mean response magnitude of 80 ipsilateral stimulus-responsive S1 RS neurons (filled markers) and 25 FS neurons as a function of cortical depth. (Left) Earliest sink (blue) in the current source density (CSD) map evoked by contralateral whisker stimuli reflects the location of layer 4 (L4). (B) Smaller proportion of stimulus-responsive RS and FS neurons in L4 of S1 compared to layer 2/3 (L2/3) and layer 5/6 (L5/6) (L2/3: 39% (9/23), L4: 15% (7/48), L5/6: 33% (89/266), L2/3 vs L4:  $p = 0.041$ , L5/6 vs L4:  $p = 0.018$ , chi-squared test with Bonferroni correction for two comparisons). (C) Same as (A), but for 133 ipsilateral stimulus-responsive S2 RS neurons and 60 FS neurons. (D) Comparable proportions of stimulus-responsive RS and FS neurons in L4 as in L2/3 and L5/6 in S2 (L2/3: 43% (34/80), L4: 33% (26/79), L5/6: 45% (133/295), L4 vs L2/3:  $p = 0.42$ , L5/6 vs L4:  $p = 0.10$ , chi-squared test with Bonferroni correction for two comparisons). (E) Comparable positive ( $R > 0$ ) and negative ( $R < 0$ ) ipsilateral response magnitudes across laminae in S1 and S2 (S1  $R > 0$ : L2/3:  $0.24 \pm 0.04$  ( $n=3$ ), z-score, median  $\pm$  MAD, L4:  $0.47 \pm 0.00$  ( $n=1$ ), L5/6:  $0.51 \pm 0.27$  ( $n=48$ ),  $p = 0.69$ , Kruskal-Wallis test, S1  $R < 0$ : L2/3:  $-0.41 \pm 0.08$  ( $n=6$ ), L4:  $-0.31 \pm 0.07$  ( $n=6$ ), L5/6:  $-0.38 \pm 0.16$  ( $n=41$ ),  $p = 0.60$  / S2  $R > 0$ : L2/3:  $0.87 \pm 0.37$  ( $n=20$ ), L4:  $0.70 \pm 0.41$  ( $n=15$ ), L5/6:  $0.88 \pm 0.48$  ( $n=71$ ),  $p = 0.72$ , S2  $R < 0$ : L2/3:  $-0.35 \pm 0.10$  ( $n=14$ ), L4:  $-0.32 \pm 0.14$  ( $n=11$ ), L5/6:  $-0.45 \pm 0.14$  ( $n=62$ ),  $p = 0.038$ , further pairwise comparisons using Tukey's test all  $p > 0.05$ ). (F) Comparable ipsilateral positive and negative response variability across laminae in S1 and S2. Variability is quantified as the coefficient of variation (CV) of the response magnitude. (S1: L2/3:  $3.97 \pm 0.23$  ( $n=9$ ), median  $\pm$  MAD, L4:  $5.37 \pm 1.42$  ( $n=7$ ), L5/6:  $4.69 \pm 1.86$  ( $n=89$ ),  $p = 0.80$ , Kruskal-Wallis test, S2: L2/3:  $4.22 \pm 1.67$  ( $n=34$ ), L4:  $4.41 \pm 1.45$  ( $n=26$ ), L5/6:  $3.59 \pm 1.61$  ( $n=133$ ),  $p = 0.48$ ). (G) Comparable ipsilateral positive and negative response onset latency across laminae in S1 and S2. (S1: L2/3:  $25.0 \pm 15.0$  ms ( $n=7$ ), median  $\pm$  MAD, L4:  $28.5 \pm 16.8$  ms ( $n=6$ ), L5/6:  $19.6 \pm 6.3$  ms ( $n=63$ ),  $p = 0.87$ , Kruskal-Wallis test, S2: L2/3:  $16.4 \pm 5.4$  ms ( $n=21$ ), L4:  $17.0 \pm 5.4$  ms ( $n=20$ ), L5/6:  $18.2 \pm 7.8$  ( $n=106$ ),  $p = 0.71$ ). NS  $p \geq 0.05$ , \*  $p < 0.05$ .



## 496 **S2 neuron spiking supports higher ipsilateral stimulus decoding accuracy**

497         Given that ipsilateral whisker deflections elicit relatively small amplitude and more  
498 variable increases and decreases in spiking in a fraction of RS neurons in S1 and S2  
499 compared to contralateral whisker stimuli, it is unclear how accurately neuronal population  
500 activity enables single-trial ipsilateral stimulus decoding. To answer this question, we first  
501 probed whether the occurrence of an ipsilateral stimulus delivered at a velocity of 1000  
502 %/s could be detected from the spiking activity of populations of S1 and S2 RS neurons.  
503 We implemented linear discriminant analysis (LDA) classifiers to partition RS neuron  
504 spike counts occurring 50 ms post stimulus, and compared the same intervals on trials  
505 with no stimulus (Figure 5A, see Materials and Methods). It is important to note that LDA  
506 allows individual neurons to contribute to stimulus detection independently and regardless  
507 of the sign of their stimulus-evoked spiking modulation. This means that both positive and  
508 negative changes in spiking may contribute to stimulus detection assuming they provide  
509 useful information to the classifier. Simultaneously recorded RS neurons from 8 S1 and  
510 8 S2 recordings were initially used as input to the classifiers (S1:  $22 \pm 4$  RS/rec, median  
511  $\pm$  MAD, range: 14 – 35 RS/rec, S2:  $27 \pm 9$  RS/rec, range: 14 – 40 RS/rec,  $p = 0.55$ , two-  
512 sided Wilcoxon rank-sum test), which we refer to here as *within-recording* classifiers. For  
513 each neuron, stimulus-evoked and spontaneous spike counts from 70 trials each were  
514 randomly assigned to a training or a testing set according to a 10-fold cross-validation  
515 scheme, resulting in a total of 126 training trials and 14 testing trials. We found that the  
516 presence of an ipsilateral whisker stimulation could be detected with above-chance  
517 accuracy using either S1 or S2 RS neuron spiking (S1:  $56.4 \pm 5.0$  %, chance:  $49.6 \pm 1.8$   
518 %, median  $\pm$  MAD,  $p = 0.039$ , two-sided Wilcoxon rank-sum test, S2:  $72.9 \pm 11.1$  %, chance:  
519  $51.1 \pm 1.8$  %,  $p = 0.0078$ ), but with higher performance from S2 than S1  
520 populations ( $p = 0.041$ , two-sided Wilcoxon rank-sum test) (Figure 5B).

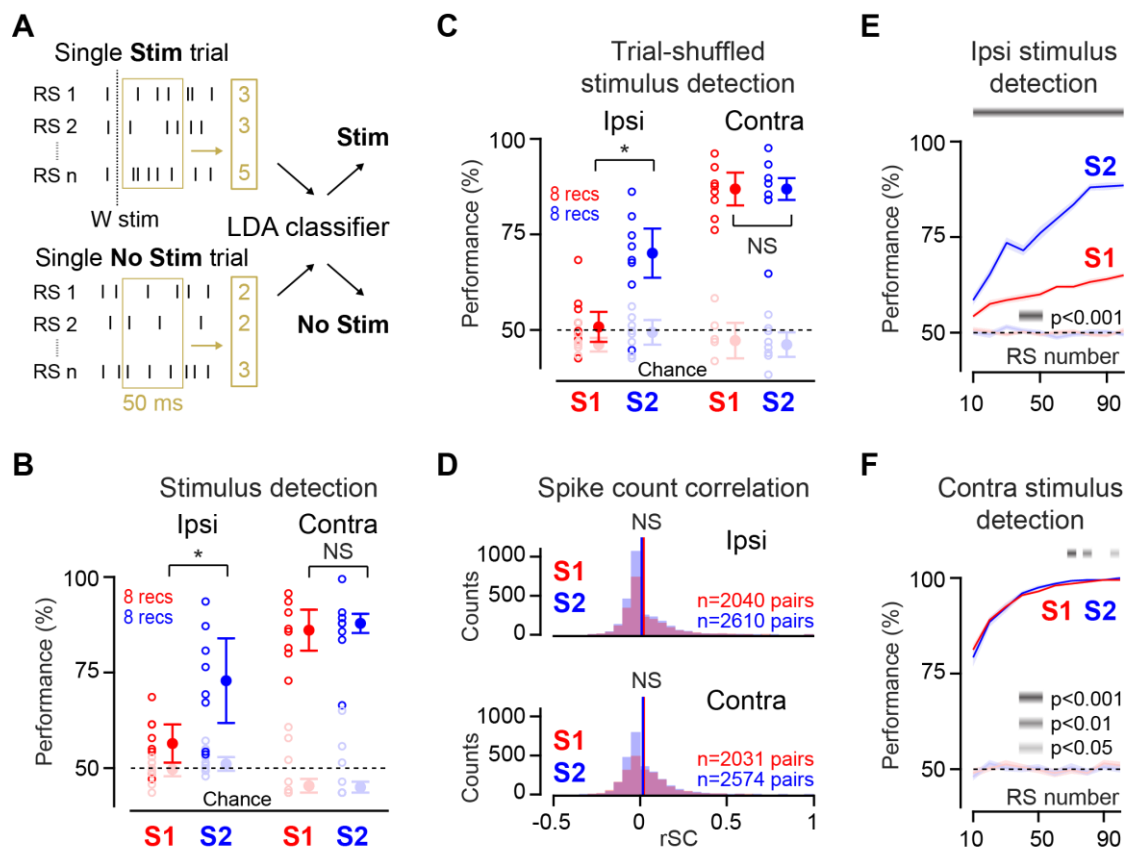

**Figure 5. Higher ipsilateral stimulus detectability from S2 RS neuron spiking compared to S1.**

(A) A linear discriminant analysis (LDA) classifier partitions RS neuron single-trial spike counts occurring between 0 and 50 ms after whisker stimulation (Stim) from spike counts measured in the absence of whisker stimuli (No Stim). (B) Higher ipsilateral stimulus detection performance for simultaneously recorded S2 RS neurons compared to S1 RS neurons and comparable detection performance for contralateral stimuli (Ipsi: S1:  $56.4 \pm 5.0\%$  ( $n = 8$  recordings), S2:  $72.9 \pm 11.1\%$  ( $n = 8$  recordings), median  $\pm$  MAD,  $p = 0.041$ , two-sided Wilcoxon rank-sum test, Contra: S1:  $86.1 \pm 5.4\%$ , S2:  $87.9 \pm 2.5\%$ ,  $p = 0.74$ ). (C) Same as (B) but for RS neuron spike counts randomly shuffled across trials (Ipsi: S1:  $53.2 \pm 3.9\%$  ( $n = 8$  recordings), S2:  $72.5 \pm 6.4\%$  ( $n = 8$  recordings), median  $\pm$  MAD,  $p = 0.021$ , two-sided Wilcoxon rank-sum test, Contra: S1:  $89.3 \pm 4.3\%$ , S2:  $89.3 \pm 2.9\%$ ,  $p = 0.74$ ). (D) Comparable magnitude of spike count correlation ( $r_{SC}$ ) between pairs of RS neurons in S1 and S2. Vertical bars represent the mean  $r_{SC}$  values (Ipsi: S1:  $0.020 \pm 0.123$ , mean  $\pm$  SD, S2:  $0.009 \pm 0.109$ ,  $p = 0.21$ , two-sided  $t$ -test, Contra: S1:  $0.021 \pm 0.115$ , S2:  $0.016 \pm 0.111$ ,  $p = 0.14$ ). (E) S1 and S2 ipsilateral stimulus detection performance (median  $\pm$  SD) as a function of the number of RS neurons selected across recordings as inputs to the classifier. Grey bar at the top indicates significance of the S1 versus S2 comparison using a two-sided Wilcoxon rank-sum test. (F) Same as (E), but for contralateral stimulus detection performance. Chance datapoints are obtained by randomly shuffling the class labels of the training set trials. All detection performances are larger than performances obtained for chance data ( $p < 0.05$ , two-sided Wilcoxon signed-rank test). In (E and F), median detection performance is computed across 100 repetitions of the classification task, and error bars represent a bootstrapped estimate of the standard deviation of the median. NS  $p \geq 0.05$ , \*  $p < 0.05$ .

522 This difference was specific to the ipsilateral stimulus, since contralateral stimuli were  
523 detected equally well from S1 or S2 spiking (S1:  $86.1 \pm 5.4$  %, median  $\pm$  MAD, S2:  $87.9$   
524  $\pm 2.5$  %,  $p = 0.74$ , two-sided Wilcoxon rank-sum test), and with higher overall accuracy  
525 (Figure 5B). To further examine the contribution of specific subpopulations of RS neurons  
526 to stimulus detection, we implemented a different set of classifiers, selecting the classifier  
527 input RS neuron population by random sampling across recordings, which we refer to  
528 here as *across-recordings* classifiers. Across-recordings sampling abolishes trial-by-trial  
529 covariations in individual neuron activity, which may affect stimulus coding (Zohary et al.  
530 1994, reviewed in Averbeck et al. 2006). As a control, we first verified that the S1 versus  
531 S2 difference in ipsilateral stimulus detection performance was not driven by a difference  
532 in such covariations. First, we built *within-recording* classifiers as described above, except  
533 that we randomly shuffled spike counts across trials, thereby disrupting trial-specific  
534 covariations in spiking across simultaneously recorded neurons. Doing so did not  
535 eliminate the S1 versus S2 difference in ipsilateral stimulus detection performance, and  
536 preserved the comparable detection performances in S1 and S2 obtained for contralateral  
537 stimuli (Figure 5C). Then, we directly estimated the amount of covariation in the stimulus-  
538 evoked activity of individual neurons by measuring spike count correlations (rSC) across  
539 pairs of simultaneously recorded neurons, and found no difference in their magnitude  
540 comparing S1 and S2 for either ipsilateral or contralateral stimuli (Figure 5D). Having  
541 established that covariations in individual neuron activities on a trial-by-trial basis do not  
542 differentially affect S1 and S2 stimulus detection performances, we built *across-*  
543 *recordings* classifiers selecting RS neurons forming the classifier input population from  
544 all 8 S1 and 8 S2 recordings respectively (selection pool size of 184 RS neurons for S1  
545 and 205 RS neurons for S2), and used a diagonal covariance matrix to prevent the  
546 contribution of spurious covariations in spiking activity to detection performance. Similarly

547 to the classifiers built from simultaneously recorded neurons, stimulus-evoked and  
 548 spontaneous spike counts were randomly assigned to a training or a testing set,  
 549 according to a 10-fold cross-validation scheme. Within each set, spike counts were  
 550 sampled with replacement to generate a total of 180 training trials and 20 testing trials.  
 551 This procedure was repeated 100 times to determine detection performance across  
 552 different combinations of neurons and trials. Such classifiers recapitulated the S1 versus  
 553 S2 difference in ipsilateral stimulus detection performance, and the comparable detection  
 554 performances obtained for contralateral stimuli (Figure 5E, F). These results were  
 555 independent of the number of trials and repetitions, though absolute detection  
 556 performance values in both S1 and S2 increased with the number of neurons forming the  
 557 classifier input population for both ipsilateral and contralateral stimuli (Figure 5E, F).

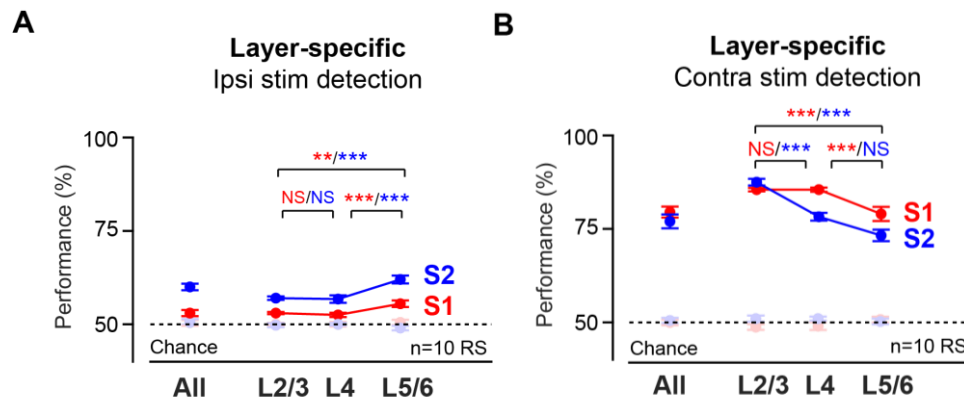

**Figure 6. Highest ipsilateral stimulus detectability from L5/6 RS neuron.**

(A) Higher ipsilateral stimulus detection performance for L5/6 RS neurons compared to L2/3 and L4 neurons in S1 and S2 (S1: L2/3:  $53 \pm 0.3$  %, L4:  $52.5 \pm 0.6$  %, L5/6:  $55.5 \pm 0.9$  %, median  $\pm$  SD, L5/6 vs L2/3:  $p = 0.0012$ , L5/6 vs L4:  $p = 0.00016$ , two-sided Wilcoxon rank-sum test with Bonferroni correction for three comparisons, S2: L2/3:  $57 \pm 0.5$  %, L4:  $56.8 \pm 1$  %, L5/6:  $62 \pm 1$  %, L5/6 vs L2/3:  $p = 1.43 \cdot 10^{-6}$ , L5/6 vs L4:  $p = 0.00027$ ). (B) Higher contralateral stimulus detection performance for L2/3 RS neurons compared to L5/6 RS neurons in S1 and S2 (S1: L2/3:  $85.5 \pm 0.5$  %, L5/6:  $79 \pm 2$  %, median  $\pm$  SD,  $p = 1.96 \cdot 10^{-6}$ , two-sided Wilcoxon rank-sum test, S2: L2/3:  $87.5 \pm 0.9$  %, L5/6:  $73.3 \pm 1.5$  %,  $p = 1.90 \cdot 10^{-11}$ ). Chance datapoints are obtained by randomly shuffling the class labels of the training set trials. All detection performances are larger than performances obtained for chance data ( $p < 0.01$ , two-sided Wilcoxon signed-rank test). Median detection performance is computed across 100 repetitions of the classification task, and error bars represent a bootstrapped estimate of the standard deviation of the median. NS  $p \geq 0.05$ , \*\*  $p < 0.01$ , \*\*\*  $p < 0.001$ .

558 To specifically examine the contribution of subpopulations of RS neurons located  
559 in different neocortical laminae to stimulus detection, we built classifiers with an input  
560 population size of 10 RS neurons to account for the size of laminar-specific S1 and S2  
561 sampling pools (see Materials and Methods). We found that in both S1 and S2, L5/6  
562 neurons lead to greatest ipsilateral stimulus detection performance (Figure 6A), while they  
563 performed worst for contralateral stimulus detection (Figure 6B).

564 One possible explanation for the higher detection performance obtained from S2  
565 spiking within and across laminae could be the higher proportion of stimulus-responsive  
566 RS neurons observed in S2 compared to S1. To investigate this, we implemented  
567 classifiers with 24 input RS neurons (our average yield per recording), while matching the  
568 proportion of stimulus-responsive neurons in S1 and S2, which led to a comparable  
569 interareal difference in detection performance (Figure 7A), thus ruling out the number of  
570 stimulus-responsive RS neurons in each area as a contributor of the S2 versus S1  
571 difference in detection performance. Then, we focused on stimulus-responsive RS  
572 neurons, as the spiking of non-responsive RS neurons led to detection performances not  
573 different from chance levels in both S1 and S2 (Figure 7B). Detection performance  
574 diminished, and more so in S2 than in S1, when only RS neurons with negative response  
575 magnitudes were used as input to the classifier (Figure 7C), which resulted in a drastic  
576 reduction of the amplitude of the S2 versus S1 difference in stimulus detectability (Figure  
577 7D). On the contrary, when only RS neurons with positive response magnitudes were  
578 used as the classifier input population, detection performance was further enhanced in  
579 S2 compared to S1 (Figure 7C), leading to an augmentation of the interareal difference  
580 in stimulus detection performance (Figure 7D), likely due to the larger absolute magnitude  
581 of positive responses, and even more so in S2, as compared to the negative ones. This  
582 finding thus identifies a predominant role for S1 and S2 RS neurons with increased

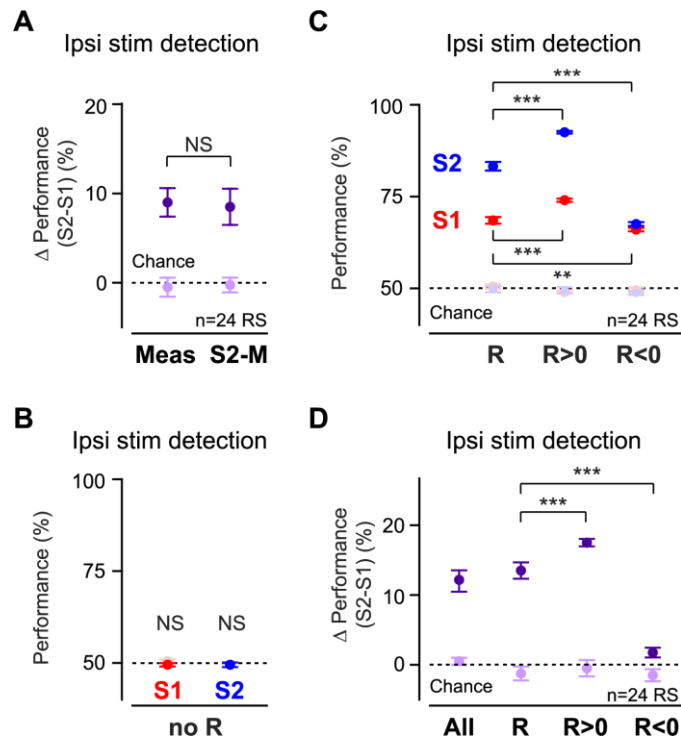

**Figure 7. S2 versus S1 ipsilateral stimulus detectability difference arises from spiking of stimulus-responsive RS neurons with positive response magnitude.**

(A) Matching the percentage of S1 stimulus-responsive RS neurons to that measured in S2 (S2-M) does not reduce the difference in ipsilateral detection performance between the two areas (Meas) ( $\Delta$  Measured %:  $9 \pm 1.6$  %,  $\Delta$  S2-Matched %:  $8.5 \pm 2.0$  %, median  $\pm$  SD,  $p = 0.57$ , two-sided Wilcoxon rank-sum test). (B) Chance-level ipsilateral stimulus detection performance for non-stimulus-responsive S1 and S2 RS neurons (S1:  $50.0 \pm 0.5$  %, chance:  $50.5 \pm 0.4$  %, median  $\pm$  SD,  $p = 0.37$ , two-sided Wilcoxon rank-sum test, S2:  $49.5 \pm 0.6$  %, chance:  $49.5 \pm 0.6$  %,  $p = 0.90$ ). (C) Enhanced ipsilateral stimulus detection performance for stimulus-responsive RS neurons with positive response magnitude ( $R>0$ ) and decreased for RS neurons with negative response magnitude ( $R<0$ ) (S1: R:  $68.5 \pm 0.9$  %,  $R>0$ :  $74 \pm 0.4$  %,  $R<0$ :  $66 \pm 0.5$  %, median  $\pm$  SD, R versus  $R>0$ :  $p = 2.78 \cdot 10^{-10}$ , R versus  $R<0$ :  $p = 0.0044$ , two-sided Wilcoxon rank-sum test with Bonferroni correction for two comparisons, S2: R:  $83.3 \pm 1.1$  %,  $R>0$ :  $92.5 \pm 0.4$  %,  $R<0$ :  $67.5 \pm 0.5$  %, R versus  $R>0$ :  $p = 4.03 \cdot 10^{-16}$ , R versus  $R<0$ :  $p = 1.12 \cdot 10^{-26}$ ). (D) Increased S2 versus S1 difference in ipsilateral stimulus detection performance for stimulus-responsive RS neurons with positive response magnitude ( $R>0$ ) and strong reduction for stimulus-responsive RS neurons with negative response magnitude ( $R<0$ ) ( $\Delta$  R:  $13.5 \pm 1.1$  %,  $\Delta$   $R>0$ :  $17.5 \pm 0.6$  %,  $\Delta$   $R<0$ :  $1.8 \pm 0.7$  %, median  $\pm$  SD,  $\Delta$  R vs  $\Delta$   $R>0$ :  $p = 0.00064$ ,  $\Delta$  R vs  $\Delta$   $R<0$ :  $p = 1.58 \cdot 10^{-16}$ , two-sided Wilcoxon rank-sum test with Bonferroni correction for two comparisons). Median detection performance is computed across 100 repetitions of the classification task. Error bars represent a bootstrapped estimate of the standard deviation of the median. Chance datapoints are obtained by randomly shuffling the class labels of the training set trials. All detection performances, and S2-S1 detection performance differences, are larger than performances obtained for chance data ( $p<0.01$ , two-sided Wilcoxon rank-sum test). NS  $p \geq 0.05$ , \*\*  $p < 0.01$ , \*\*\*  $p < 0.001$ .

584 detection performance achieved from S2 compared to S1.

585 Having established that the spiking activity of both S1 and S2 RS neurons contains  
 586 enough information to detect the occurrence of single ipsilateral stimuli, we then probed  
 587 whether it contained additional information regarding stimulus features. We focused on  
 588 whisker deflection velocity, as this has previously been shown to be an important aspect  
 589 of contralateral whisker motion that is encoded in the spiking rate of individual S1 neurons  
 590 (Simons 1978, Ito 1985, Pinto et al. 2000, Arabzadeh et al. 2003, Arabzadeh et al. 2004,  
 591 Wilent and Contreras 2004, Bolori et al. 2010, Ranjbar-Slamloo and Arabzadeh 2017).

|           |                       | <b>Ipsi-responsive RS</b> |                 | <b>Contra-responsive RS</b> |                 |
|-----------|-----------------------|---------------------------|-----------------|-----------------------------|-----------------|
|           |                       | <b>R &gt; 0</b>           | <b>R &lt; 0</b> | <b>R &gt; 0</b>             | <b>R &lt; 0</b> |
| <b>S1</b> | Proportion of neurons | 28% (49/172)              |                 | 76% (130/172)               |                 |
|           |                       | 63% (31/49)               | 37% (18/49)     | 75% (98/130)                | 25% (32/130)    |
|           | Z-scored magnitude    | 0.50 ± 0.23               | -0.26 ± 0.06    | 1.48 ± 0.99                 | -0.39 ± 0.10    |
|           | Variability (CV)      | 6.30 ± 2.44               | 5.22 ± 1.38     | 3.02 ± 1.49                 | 3.81 ± 1.33     |
|           | Onset latency (ms)    | 17.0 ± 6.8                | 19.0 ± 13.0     | 11.0 ± 3.0                  | 25.0 ± 10.0     |
| <b>S2</b> | Proportion of neurons | 36% (54/148)              |                 | 70% (103/148)               |                 |
|           |                       | 54% (29/54)               | 46% (25/54)     | 67% (69/103)                | 33% (34/103)    |
|           | Z-scored magnitude    | 0.70 ± 0.32               | -0.32 ± 0.13    | 1.00 ± 0.64                 | -0.43 ± 0.14    |
|           | Variability (CV)      | 5.46 ± 2.14               | 5.56 ± 2.15     | 3.97 ± 1.80                 | 3.45 ± 1.31     |
|           | Onset latency (ms)    | 22.2 ± 9.4                | 25.5 ± 11.5     | 12.8 ± 4.6                  | 20.5 ± 10.5     |
|           |                       | <b>Ipsi-responsive FS</b> |                 | <b>Contra-responsive FS</b> |                 |
|           |                       | <b>R &gt; 0</b>           | <b>R &lt; 0</b> | <b>R &gt; 0</b>             | <b>R &lt; 0</b> |
| <b>S1</b> | Proportion of neurons | 46% (13/28)               |                 | 89% (25/28)                 |                 |
|           |                       | 85% (11/13)               | 15% (2/13)      | 96% (24/25)                 | 4% (1/25)       |
| <b>S2</b> | Proportion of neurons | 41% (13/32)               |                 | 94% (30/32)                 |                 |
|           |                       | 85% (11/13)               | 15% (2/13)      | 97% (29/30)                 | 3% (1/30)       |

**Table 2: Proportion of stimulus-responsive RS and FS neurons and response properties: 200 %/s stimuli.**

Proportion of RS and FS neurons with a significant response to 200 %/s ipsilateral or contralateral stimuli. Response magnitude (z-score), variability (coefficient of variation, CV), and onset latency are reported as median ± MAD.



592 We asked whether single whisker stimuli delivered at two different velocities could be  
593 discriminated on the basis of ipsilateral neural activity in S1 versus S2. We considered  
594 changes in RS neurons spiking evoked by stimuli of 200 °/s and 1000 °/s velocity (Figure  
595 8A). The 200 °/s ipsilateral stimuli elicited a significant change in firing in a proportion of  
596 S1 and S2 RS neurons (Table 2) comparable to that obtained in response to 1000 °/s  
597 stimuli (Table 1) (S1:  $p = 0.55$ , S2:  $p = 0.60$ , chi-squared test). Overall, RS responses to  
598 200 °/s ipsilateral stimuli were characterized by a reduction in magnitude, without  
599 noticeable change in variability or onset latency compared to responses evoked by 1000  
600 °/s stimuli (Tables 1 and 2). Exceptions included the magnitude of positive responses in  
601 S1 RS neurons which was similar for the two stimulus velocities ( $p = 0.34$ , one-sided  
602 Wilcoxon rank-sum test, all other comparisons:  $p < 0.05$ ), and the variability of negative  
603 responses in S2 RS neurons which was larger for 200 °/s stimuli than for 1000 °/s stimuli  
604 ( $p = 0.0027$ , one-sided Wilcoxon rank-sum test, all other comparisons:  $p \geq 0.05$ ). First,  
605 we investigated whether such overall smaller evoked changes in activity could still support  
606 ipsilateral stimulus detection. As we previously showed that implementing classifiers from  
607 neurons sampled across recordings did not noticeably alter decoding performances, we  
608 again built *across-recordings* classifiers by randomly selecting 24 RS neurons across 6  
609 S1 and 6 S2 recordings (selection pool size of 169 S1 neurons and 144 S2 neurons) and  
610 found that the presence of weaker 200 °/s ipsilateral stimuli could indeed be detected  
611 from the spiking activity of S1 and S2 RS neurons (Figure 8B) (S1:  $53.8 \pm 0.8\%$ , chance:  
612  $50.5 \pm 0.4\%$ , median  $\pm$  SD,  $p = 2.48 \cdot 10^{-5}$ , two-sided Wilcoxon rank-sum test, S2:  $61.5 \pm$   
613  $1.3\%$ , chance:  $49.5 \pm 0.7\%$ ,  $p = 1.43 \cdot 10^{-24}$ ). Then, we trained and cross-validated  
614 classifiers with 24 input RS neurons selected from a pool of 83 S1 RS neurons or 77 S2  
615 RS neurons obtained from 3 S1 and 3 S2 recordings respectively, during which stimuli of  
616 both velocities were delivered (Figure 8C).



617

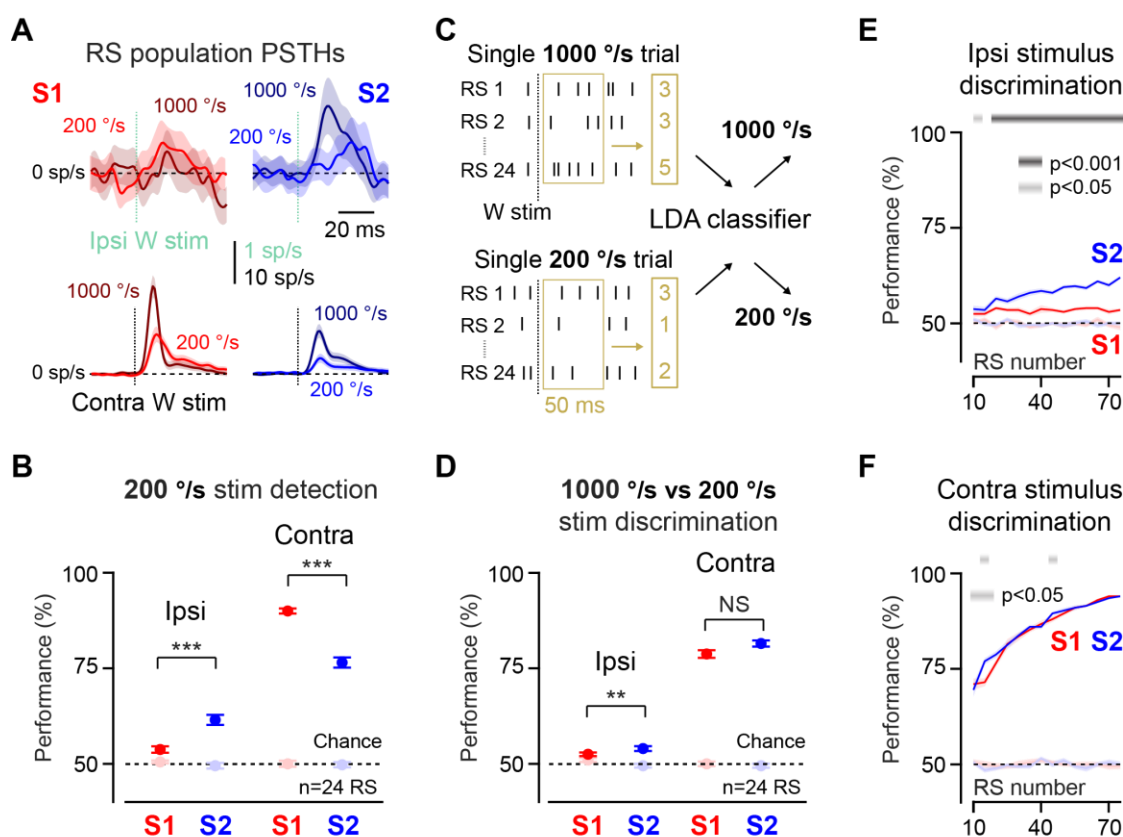

**Figure 8. Higher ipsilateral stimulus discriminability from S2 RS neuron spiking compared to S1.**

(A) (Top) Baseline-subtracted population PSTHs for S1 (red) and S2 (blue) RS neurons in response to 200 %/s ( $n = 172$  S1 RS,  $n=148$  S2 RS) and 1000 %/s ( $n = 263$  S1 RS,  $n=359$  S2 RS) ipsilateral stimuli. (Bottom) Same for contralateral stimuli. Shaded areas represent the SEM. (B) 200 %/s ipsilateral stimuli are detectable from S1 and S2 spiking at above-chance performance. Detection performance is higher for S2 than for S1 and lower than for contralateral stimuli (Ipsi: S1:  $53.8 \pm 0.8$  %, S2:  $61.5 \pm 1.3$  %, median  $\pm$  SD,  $p = 3.75 \cdot 10^{-10}$ , two-sided Wilcoxon rank-sum test, Contra: S1:  $90 \pm 0.7$  %, S2:  $76.5 \pm 1.3$  %,  $p = 7.04 \cdot 10^{-24}$ , Ipsi vs Contra: S1:  $p = 2.92 \cdot 10^{-34}$ , S2:  $p = 1.19 \cdot 10^{-21}$ ). (C) A linear discriminant analysis (LDA) classifier partitions single-trial spike counts from 24 randomly chosen RS neurons, measured between 0 and 50 ms after 1000 %/s and 200 %/s whisker stimuli. (D) Above-chance discrimination performance for ipsilateral stimuli of different velocities from S1 and S2 RS neuron spiking. Higher discriminability in S2 compared to S1, though lower than contralateral stimulus discriminability (Ipsi: S1:  $52.5 \pm 0.5$  %, S2:  $54 \pm 0.6$  %, median  $\pm$  SD,  $p = 0.0085$ , two-sided Wilcoxon rank-sum test, Contra: S1:  $78.8 \pm 1$  %, S2:  $81.5 \pm 0.8$  %,  $p = 0.087$ , Ipsi vs Contra: S1:  $p = 2.81 \cdot 10^{-34}$ , S2:  $p = 3.7 \cdot 10^{-34}$ ). (E) S1 and S2 ipsilateral stimulus discrimination performance (median  $\pm$  SD) as a function of the number of RS neurons used as inputs to the classifier. Grey bar at the top indicates significance of the S1 versus S2 comparison using a two-sided Wilcoxon rank-sum test. (F) Same as (E), but for contralateral stimulus discrimination performance. Median detection performance is computed across 100 repetitions of the classification task. Error bars represent a bootstrapped estimate of the standard deviation of the median. Chance datapoints are obtained by randomly shuffling the class labels of the training set trials. All detection performances are larger than performances obtained for chance data ( $p < 0.01$ , two-sided Wilcoxon rank-sum test). NS  $p \geq 0.05$ , \*\*  $p < 0.01$ , \*\*\*  $p < 0.001$ .

618 Overall, S1 and S2 velocity discrimination performances were lower than values obtained  
619 for contralateral stimuli (Figure 8D), but significantly higher than chance (S1:  $52.5 \pm 0.5$   
620 %, chance:  $51 \pm 0.5$  %, median  $\pm$  SD,  $p = 0.0027$ , two-sided Wilcoxon rank-sum test, S2:  
621  $54 \pm 0.6$  %, chance:  $49.5 \pm 0.5$  %,  $p = 3.75 \cdot 10^{-9}$ ). In the same way that S2 spiking  
622 supported higher ipsilateral stimulus detectability, it also enabled higher ipsilateral  
623 stimulus velocity discriminability compared to S1 (S1 versus S2:  $p = 0.0085$ , two-sided  
624 Wilcoxon rank-sum test). These results were independent of the number of trials chosen  
625 to train and test the classifiers, and of the number of repetitions of the classification task.  
626 Increasing the number of RS neurons forming the classifier input population led to an  
627 increase in ipsilateral stimulus discrimination performance in S2 only, therefore further  
628 enhancing the S2 versus S1 difference in ipsilateral stimulus discriminability (Figure 8E),  
629 while both S1 and S2 contralateral stimulus discrimination performances increased as a  
630 function of the size of the classifier input population (Figure 8F). Together, our classifier-  
631 based analyses support a role for the activity of RS neurons in somatosensory cortices,  
632 in particular in S2, in encoding the presence and the velocity of ipsilateral tactile stimuli in  
633 addition to representing contralateral sensory information.

634

635

## 636 **Discussion**

637 Our results revealed a strong representation of ipsilateral tactile stimuli in S1 and  
638 S2 of the awake mouse brain. Although spikes from both S1 and S2 RS neurons enabled  
639 the decoding of ipsilateral tactile stimuli, S2 spikes led to greater stimulus detection and  
640 feature discrimination. Ipsilateral stimuli elicited increases and decreases in spiking with  
641 equal probability in S1 and S2, both contributing to stimulus decoding, yet higher  
642 performance in S2 could be explained by less variable and larger stimulus-evoked

643 increases in spike rate compared to S1. In S1 and S2, such ipsilateral encoding of tactile  
644 information was distributed across 30-40% of neurons, located in all neocortical laminae  
645 in S2, but tending to spare layer 4 in S1. Our findings provide a functional role for  
646 ipsilateral activity in contributing to the encoding of tactile information arising from one  
647 side of the body across both cerebral hemispheres.

648         Our measurements conducted in the whisker system of awake mice corroborate  
649 previous findings in anesthetized rodents, and provide new insights into the cellular  
650 substrates of ipsilateral responses. Earlier studies have reported the existence in S1 and  
651 S2 of the ipsilateral hemisphere of excitatory neurons with increased spiking in response  
652 to unilateral tactile stimulation of various body parts (Carvell and Simons 1986,  
653 Armstrong-James and George 1988, Shuler et al. 2001, Genna et al. 2018). Here, we  
654 showed that during wakefulness, ipsilateral tactile stimuli elicited both increased and  
655 decreased spiking with equal probability in RS neurons of S1 and S2. These findings  
656 contrast with sensory responses we and others measured in response to contralateral  
657 stimuli in these two regions, which occurred with higher probability, faster latency, and  
658 with a principally increased firing rate (Crochet and Petersen 2006, Yamashita et al.  
659 2013, Minamisawa et al. 2018, Ranjbar-Slamloo and Arabzadeh 2019).

660         In addition, we provided a detailed characterization of ipsilateral responses in FS  
661 neurons, which are the most common subtype of neocortical GABAergic neurons in the  
662 mouse (Rudy et al. 2011). We found that FS neurons tended to be more responsive to  
663 ipsilateral stimuli than RS neurons, especially in S2, and that they overwhelmingly  
664 responded through an increase in spiking, with a faster onset latency compared to that  
665 of RS neurons. Although FS neurons may potentially mediate the decrease in spiking in  
666 RS neurons, further experimental investigations are necessary to establish a causal role.  
667 As the callosal projections thought to propagate changes in neural activity across

668 hemispheres have been shown to be largely glutamatergic (see review by Conti and  
669 Manzoni 1994), the suppression of ipsilateral RS neuron spiking is unlikely to occur  
670 through their direct monosynaptic effect. Besides FS neurons, other subtypes of  
671 GABAergic neurons could provide feedforward inhibition. For instance, GABAergic  
672 neurons of layer 1, which express the ionotropic serotonin receptor 5HT3a (Lee et al.  
673 2010), have been found to receive callosal inputs in the hindlimb region of S1 (Palmer et  
674 al. 2012).

675         Using laminar silicon probes, we were able to compare responses to ipsilateral  
676 stimuli across neocortical layers. We found that stimulus-responsive neurons were  
677 evenly located across all layers of S1 and S2, with the exception of L4 in S1, which  
678 contained a reduced number of neurons mostly exhibiting negative sensory responses.  
679 In rodents, as callosal axon terminals are known to be sparse in L4 of S1 (Wise 1975,  
680 Wise and Jones 1976, Akers and Killackey 1978), and as thalamocortical inputs targeting  
681 L4 have been shown to relay sensory signals solely from the opposite side of the body  
682 (Smith 1973, Waite 1973, Erzurumlu and Killackey 1980, Castejon et al. 2021), these  
683 rare L4 negative responses are likely mediated by translaminar feedforward inhibition.  
684 Further quantifications of ipsilateral sensory response properties did not reveal  
685 differences in response magnitude, variability, or onset latency as a function of laminar  
686 location, neither in S1, nor in S2. These results are at odds with in-vitro findings reporting  
687 larger monosynaptic excitatory postsynaptic potentials in L5 compared to L2/3 pyramidal  
688 neurons of S1 in response to callosal input activation (Petreanu et al. 2007), and with  
689 our decoding analyses that revealed a higher ipsilateral stimulus detection performance  
690 from L5/6 RS neurons compared to L2/3 and L4 neurons. This discrepancy could  
691 potentially be explained by the relatively small number of recorded stimulus-responsive  
692 neurons, especially in L2/3 and L4 of S1, affecting the robustness of comparisons across

693 layers.

694 Implementing classifier-based analyses enabled us to quantify the role of  
695 relatively sparse bidirectional ipsilateral changes in spiking for stimulus coding. Our  
696 population-based decoding approach clearly revealed that both strong and weak  
697 ipsilateral whisker deflections could be detected from S1 and S2 activity, and that both  
698 increased and decreased spiking contributed to stimulus detectability. Detection  
699 performance for ipsilateral stimuli in S2 reached 85-90% for >80 input neurons, but  
700 remained moderate in S1, plateauing at around 60-65% for strong stimuli when 60 or  
701 more neurons were used as input to the classifier. These differences reflect both the  
702 magnitude of responses as well as the variability in each region. As a reference,  
703 ipsilateral stimuli were always detected with lower accuracy than contralateral ones,  
704 which, when delivered at lower velocity, were better detected from S1 than from S2  
705 (Kwon et al. 2016). Stimulus discrimination proved less accurate than stimulus detection,  
706 though still reaching above-chance levels, suggesting that some amount of information  
707 about stimulus velocity is nonetheless contained in ipsilateral spiking activity, and in  
708 particular in the magnitude of the stimulus-evoked changes in spiking. Similar to what  
709 was found for stimulus detection, ipsilateral stimulus discrimination performance never  
710 reached that obtained for contralateral stimuli. This matches results obtained in single  
711 S1 neurons in anesthetized rats showing that 300-ms long spatiotemporal stimulation  
712 patterns are discriminated with lower accuracy when applied to a single digit of the  
713 ipsilateral forepaw than when applied to a contralateral digit (Genna et al. 2018).

714 A key finding of our work is the more robust representation of ipsilateral stimuli  
715 paralleled by the higher decoding performances obtained in S2 compared to S1. As we  
716 did not perform simultaneous recordings in S1 and S2, but in some instances  
717 nonetheless sequentially recorded from S1 and S2 in the same animal, we cannot

718 completely rule out any recording- and animal-specific effects. Yet, our results align with  
719 findings in macaque monkeys showing that the proportion of neurons responding to  
720 stimulation of the ipsilateral hand increases across subsequent neocortical areas of the  
721 somatosensory pathway, with area 3b of S1 containing almost no stimulus-responsive  
722 neurons, area 2 of S1 displaying a small fraction of stimulus-responsive neurons, and  
723 S2 exhibiting a majority of stimulus-responsive neurons (Iwamura et al. 1994, Burton et  
724 al. 1998, Iwamura et al. 2001, Taoka et al. 2016). Such findings are typically explained  
725 in the light of the anatomical organization of callosal projections, with dense callosal  
726 projections between the hand regions of S2 across hemispheres and sparser projections  
727 between the equivalent regions in areas 2 and 3b of S1 (Killackey et al. 1983, Manzoni  
728 et al. 1984, Manzoni et al. 1986, Krubitzer and Kaas 1990). In the mouse, although  
729 callosal projections are known to exist between the whisker regions of both S1 and S2  
730 across hemispheres (White and DeAmicis 1977, Carvell and Simons 1987, Olavarria  
731 and Van Sluyters 1995, Aronoff et al. 2010, Oh et al. 2014), it is unclear whether they  
732 follow a comparable organization. Separately, it is important to note that changes in  
733 activity induced by ipsilateral stimuli may be mediated by polysynaptic pathways within  
734 the recorded hemisphere, either across laminae within S1 or S2, but also across S1 and  
735 S2 as was shown for contralateral stimuli (Minamisawa et al. 2018), a topic for further  
736 investigations. Functionally, S2 neuron spikes have been shown to encode the frequency  
737 of vibrotactile stimuli, as well as object textures and shapes (Romo et al. 2002, Zuo et  
738 al. 2015, reviewed in Delhaye et al. 2018), as a result of the integration of more basic  
739 stimulus features across time and space within a given body side (Goldin et al. 2018).  
740 Our results further suggest that the spatial integration of stimulus features in S2 may go  
741 beyond contralateral inputs and encompass both body sides.

742 Taken together, our results reveal a cellular, laminar, and hierarchical

743 specialization for ipsilateral tactile stimulus encoding in mouse S2 versus S1. While this  
744 makes possible the notion of a sensory representation that is distributed across the two  
745 hemispheres, callosal transection studies (Stamm and Sperry 1957, Ebner and Myers  
746 1962, reviewed in Glickstein and Berlucchi 2008) seem to rather suggest that the  
747 ipsilateral representation is redundant, perhaps providing a substrate for the rapid  
748 transfer of learned unilateral tactile behaviors across body sides. The relevance of  
749 ipsilateral activity in S1, S2, and beyond, is likely to be further understood by investigating  
750 bilateral somatosensation, as ipsilateral tactile signals have been shown to modulate  
751 contralateral sensory responses already in S1 (Burton et al. 1998, Shuler et al. 2001,  
752 Wiest et al, 2005, Reed et al. 2011, reviewed in Tame et al. 2016). Future studies must  
753 thus be designed to probe and manipulate neocortical somatosensory activity during  
754 bilateral behavioral paradigms that engage, and rely on, the integration of contralateral  
755 and ipsilateral tactile information.

756

757

## 758 **References**

759 Adibi, M., & Arabzadeh, E. (2011). A comparison of neuronal and behavioral detection  
760 and discrimination performances in rat whisker system. *J Neurophysiol*, 105(1), 356-365.  
761 doi:10.1152/jn.00794.2010

762 Akers, R. M., & Killackey, H. P. (1978). Organization of corticocortical connections in the  
763 parietal cortex of the rat. *J Comp Neurol*, 181(3), 513-537. doi:10.1002/cne.901810305

764 Arabzadeh, E., Panzeri, S., & Diamond, M. E. (2004). Whisker vibration information  
765 carried by rat barrel cortex neurons. *J Neurosci*, 24(26), 6011-6020.  
766 doi:10.1523/JNEUROSCI.1389-04.2004



- 767 Arabzadeh, E., Panzeri, S., & Diamond, M. E. (2006). Deciphering the spike train of a  
768 sensory neuron: counts and temporal patterns in the rat whisker pathway. *J Neurosci*,  
769 26(36), 9216-9226. doi:10.1523/JNEUROSCI.1491-06.2006
- 770 Arabzadeh, E., Petersen, R. S., & Diamond, M. E. (2003). Encoding of whisker vibration  
771 by rat barrel cortex neurons: implications for texture discrimination. *J Neurosci*, 23(27),  
772 9146-9154. doi: 10.1523/JNEUROSCI.23-27-09146.2003.
- 773 Armstrong-James, M., & George, M. J. (1988). Bilateral receptive fields of cells in rat Sm1  
774 cortex. *Exp Brain Res*, 70(1), 155-165. doi:10.1007/BF00271857
- 775 Aronoff, R., Matyas, F., Mateo, C., Ciron, C., Schneider, B., & Petersen, C. C. (2010).  
776 Long-range connectivity of mouse primary somatosensory barrel cortex. *Eur J Neurosci*,  
777 31(12), 2221-2233. doi:10.1111/j.1460-9568.2010.07264.x
- 778 Averbeck, B. B., Latham, P. E., & Pouget, A. (2006). Neural correlations, population  
779 coding and computation. *Nat Rev Neurosci*, 7(5), 358-366. doi: 10.1038/nrn1888.
- 780 Bartho, P., Hirase, H., Monconduit, L., Zugaro, M., Harris, K. D., & Buzsaki, G. (2004).  
781 Characterization of neocortical principal cells and interneurons by network interactions  
782 and extracellular features. *J Neurophysiol*, 92(1), 600-608. doi:10.1152/jn.01170.2003
- 783 Bolori, A. R., Jenks, R. A., Desbordes, G., & Stanley, G. B. (2010). Encoding and  
784 decoding cortical representations of tactile features in the vibrissa system. *J Neurosci*,  
785 30(30), 9990-10005. doi:10.1523/JNEUROSCI.0807-10.2010
- 786 Burton, H., Sinclair, R. J., & Whang, K. (1998). Vibrotactile stimulus order effects in  
787 somatosensory cortical areas of rhesus monkeys. *Somatosens Mot Res*, 15(4), 316-324.  
788 doi:10.1080/08990229870727



- 789 Carvell, G. E., & Simons, D. J. (1986). Somatotopic organization of the second  
790 somatosensory area (SII) in the cerebral cortex of the mouse. *Somatosens Res*, 3(3),  
791 213-237. doi:10.3109/07367228609144585
- 792 Carvell, G. E., & Simons, D. J. (1987). Thalamic and corticocortical connections of the  
793 second somatic sensory area of the mouse. *J Comp Neurol*, 265(3), 409-427.  
794 doi:10.1002/cne.902650309
- 795 Castejon, C., Martin-Cortecero, J., & Nunez, A. (2021). Higher-order thalamic encoding  
796 of somatosensory patterns and bilateral events. *Front Neural Circuits*, 15:752804. doi:  
797 10.3389/fncir.2021.752804
- 798 Cisse, Y., Grenier, F., Timofeev, I., & Steriade, M. (2003). Electrophysiological properties  
799 and input-output organization of callosal neurons in cat association cortex. *J*  
800 *Neurophysiol*, 89(3), 1402-1413. doi:10.1152/jn.0871.2002
- 801 Cisse, Y., Nita, D. A., Steriade, M., & Timofeev, I. (2007). Callosal responses of fast-  
802 rhythmic-bursting neurons during slow oscillation in cats. *Neuroscience*, 147(2), 272-276.  
803 doi:10.1016/j.neuroscience.2007.04.025
- 804 Conti, F., & Manzoni, T. (1994). The neurotransmitters and postsynaptic actions of  
805 callosally projecting neurons. *Behav Brain Res*, 64(1-2), 37-53. doi:10.1016/0166-  
806 4328(94)90117-1
- 807 Crochet, S., & Petersen, C. C. (2006). Correlating whisker behavior with membrane  
808 potential in barrel cortex of awake mice. *Nat Neurosci*, 9(5), 608-610. doi:10.1038/nn1690
- 809 Delhaye, B. P., Long, K. H., & Bensmaia, S. J. (2018). Neural Basis of Touch and  
810 Proprioception in Primate Cortex. *Compr Physiol*, 8(4), 1575-1602.  
811 doi:10.1002/cphy.c170033

- 812 Ebner, F. F., & Myers, R. E. (1962). Corpus callosum and the interhemispheric  
813 transmission of tactual learning. *J Neurophysiol*, 25, 380-391.  
814 doi:10.1152/jn.1962.25.3.380
- 815 Eickhoff, S. B., Grefkes, C., Fink, G. R., & Zilles, K. (2008). Functional lateralization of  
816 face, hand, and trunk representation in anatomically defined human somatosensory  
817 areas. *Cereb Cortex*, 18(12), 2820-2830. doi:10.1093/cercor/bhn039
- 818 Erzurumlu, R. S., & Killackey, H. P. (1980). Diencephalic projections of the subnucleus  
819 interpolaris of the brainstem trigeminal complex in the rat. *Neuroscience*, 5(11), 1891-  
820 1901. doi: 10.1016/0306-4522(80)90037-8
- 821 Fabri, M., Polonara, G., Quattrini, A., Salvolini, U., Del Pesce, M., & Manzoni, T. (1999).  
822 Role of the corpus callosum in the somatosensory activation of the ipsilateral cerebral  
823 cortex: an fMRI study of callosotomized patients. *Eur J Neurosci*, 11(11), 3983-3994.  
824 doi:10.1046/j.1460-9568.1999.00829.x
- 825 Fanselow, E. E., & Nicolelis, M. A. (1999). Behavioral modulation of tactile responses in  
826 the rat somatosensory system. *J Neurosci*, 19(17), 7603-7616. doi:  
827 10.1523/JNEUROSCI.19-17-07603.1999.
- 828 Fee, M. S., Mitra, P. P., & Kleinfeld, D. (1996). Automatic sorting of multiple unit neuronal  
829 signals in the presence of anisotropic and non-Gaussian variability. *Journal of*  
830 *Neuroscience Methods*, 69(2), 175-188. doi:Doi 10.1016/S0165-0270(96)00050-7
- 831 Ferezou, I., Haiss, F., Gentet, L. J., Aronoff, R., Weber, B., & Petersen, C. C. (2007).  
832 Spatiotemporal dynamics of cortical sensorimotor integration in behaving mice. *Neuron*,  
833 56(5), 907-923. doi:10.1016/j.neuron.2007.10.007
- 834 Freeman, J. A., & Nicholson, C. (1975). Experimental optimization of current source-

835 density technique for anuran cerebellum. *J Neurophysiol*, 38(2), 369-382.  
836 doi:10.1152/jn.1975.38.2.369

837 Genna, C., Oddo, C. M., Mazzoni, A., Wahlbom, A., Micera, S., & Jorntell, H. (2018).  
838 Bilateral Tactile Input Patterns Decoded at Comparable Levels But Different Time Scales  
839 in Neocortical Neurons. *J Neurosci*, 38(15), 3669-3679. doi:10.1523/JNEUROSCI.2891-  
840 17.2018

841 Glickstein, M., & Berlucchi, G. (2008). Classical disconnection studies of the corpus  
842 callosum. *Cortex*, 44(8), 914-927. doi:10.1016/j.cortex.2008.04.001

843 Goldin, M. A., Harrell, E. R., Estebanez, L., & Shulz, D. E. (2018). Rich spatio-temporal  
844 stimulus dynamics unveil sensory specialization in cortical area S2. *Nat Commun*, 9(1),  
845 4053. doi:10.1038/s41467-018-06585-4

846 Harris, K. D., Hirase, H., Leinekugel, X., Henze, D. A., & Buzsaki, G. (2001). Temporal  
847 interaction between single spikes and complex spike bursts in hippocampal pyramidal  
848 cells. *Neuron*, 32(1), 141-149. doi:10.1016/s0896-6273(01)00447-0

849 Haslinger, R., Ulbert, I., Moore, C. I., Brown, E. N., & Devor, A. (2006). Analysis of LFP  
850 phase predicts sensory response of barrel cortex. *J Neurophysiol*, 96(3), 1658-1663.  
851 doi:10.1152/jn.01288.2005

852 Higley, M. J., & Contreras, D. (2007). Cellular mechanisms of suppressive interactions  
853 between somatosensory responses in vivo. *J Neurophysiol*, 97(1), 647-658.  
854 doi:10.1152/jn.00777.2006

855 Hill, D. N., Mehta, S. B., & Kleinfeld, D. (2011). Quality metrics to accompany spike sorting  
856 of extracellular signals. *J Neurosci*, 31(24), 8699-8705. doi:10.1523/JNEUROSCI.0971-  
857 11.2011

- 858 Hlushchuk, Y., & Hari, R. (2006). Transient suppression of ipsilateral primary  
859 somatosensory cortex during tactile finger stimulation. *J Neurosci*, 26(21), 5819-5824.  
860 doi:10.1523/JNEUROSCI.5536-05.2006
- 861 Hooks, B. M., Hires, S. A., Zhang, Y. X., Huber, D., Petreanu, L., Svoboda, K., &  
862 Shepherd, G. M. (2011). Laminar analysis of excitatory local circuits in vibrissal motor and  
863 sensory cortical areas. *PLoS Biol*, 9(1), e1000572. doi:10.1371/journal.pbio.1000572
- 864 Horváth, C., Tóth, L. F., Ulbert, I., & Fiáth, R. (2021). Dataset of cortical activity recorded  
865 with high spatial resolution from anesthetized rats. *Sci Data*, 8(1):180. doi:  
866 10.1038/s41597-021-00970-3
- 867 Ito, M. (1985). Processing of vibrissa sensory information within the rat neocortex. *J*  
868 *Neurophysiol*, 54(3), 479-490. doi:10.1152/jn.1985.54.3.479
- 869 Iwamura, Y., Iriki, A., & Tanaka, M. (1994). Bilateral hand representation in the postcentral  
870 somatosensory cortex. *Nature*, 369(6481), 554-556. doi:10.1038/369554a0
- 871 Iwamura, Y., Taoka, M., & Iriki, A. (2001). Bilateral activity and callosal connections in the  
872 somatosensory cortex. *Neuroscientist*, 7(5), 419-429. doi:10.1177/107385840100700511
- 873 Karayannis, T., Huerta-Ocampo, I., & Capogna, M. (2007). GABAergic and pyramidal  
874 neurons of deep cortical layers directly receive and differently integrate callosal input.  
875 *Cereb Cortex*, 17(5), 1213-1226. doi:10.1093/cercor/bhl035
- 876 Killackey, H. P., Gould, H. J., 3rd, Cusick, C. G., Pons, T. P., & Kaas, J. H. (1983). The  
877 relation of corpus callosum connections to architectonic fields and body surface maps in  
878 sensorimotor cortex of new and old world monkeys. *J Comp Neurol*, 219(4), 384-419.  
879 doi:10.1002/cne.902190403

- 880 Krubitzer, L. A., & Kaas, J. H. (1990). The organization and connections of  
881 somatosensory cortex in marmosets. *J Neurosci*, 10(3), 952-974. doi:  
882 10.1523/JNEUROSCI.10-03-00952.1990.
- 883 Kwon, S. E., Yang, H., Minamisawa, G., & O'Connor, D. H. (2016). Sensory and decision-  
884 related activity propagate in a cortical feedback loop during touch perception. *Nat*  
885 *Neurosci*, 19(9), 1243-1249. doi:10.1038/nn.4356
- 886 Lee, S., Hjerling-Leffler, J., Zagha, E., Fishell, G., & Rudy, B. (2010). The largest group  
887 of superficial neocortical GABAergic interneurons expresses ionotropic serotonin  
888 receptors. *J Neurosci*, 30(50), 16796-16808. doi:10.1523/JNEUROSCI.1869-10.2010
- 889 Lipton, M. L., Fu, K. M., Branch, C. A., & Schroeder, C. E. (2006). Ipsilateral hand input  
890 to area 3b revealed by converging hemodynamic and electrophysiological analyses in  
891 macaque monkeys. *J Neurosci*, 26(1), 180-185. doi:10.1523/JNEUROSCI.1073-05.2006
- 892 Ludwig, K. A., Langhals, N. B., Joseph, M. D., Richardson-Burns, S. M., Hendricks, J. L.,  
893 & Kipke, D. R. (2011). Poly(3,4-ethylenedioxythiophene) (PEDOT) polymer coatings  
894 facilitate smaller neural recording electrodes. *J Neural Eng*, 8(1), 014001.  
895 doi:10.1088/1741-2560/8/1/014001
- 896 Madisen, L., Zwingman, T. A., Sunkin, S. M., Oh, S. W., Zariwala, H. A., Gu, H., . . . Zeng,  
897 H. (2010). A robust and high-throughput Cre reporting and characterization system for  
898 the whole mouse brain. *Nat Neurosci*, 13(1), 133-140. doi:10.1038/nn.2467
- 899 Manzoni, T., Barbaresi, P., & Conti, F. (1984). Callosal mechanism for the  
900 interhemispheric transfer of hand somatosensory information in the monkey. *Behav Brain*  
901 *Res*, 11(2), 155-170. doi:10.1016/0166-4328(84)90138-4
- 902 Manzoni, T., Conti, F., & Fabri, M. (1986). Callosal projections from area SII to SI in

- 903 monkeys: anatomical organization and comparison with association projections. *J Comp*  
904 *Neurol*, 252(2), 245-263. doi:10.1002/cne.902520208
- 905 Masino, S. A., Kwon, M. C., Dory, Y., & Frostig, R. D. (1993). Characterization of  
906 functional organization within rat barrel cortex using intrinsic signal optical imaging  
907 through a thinned skull. *Proc Natl Acad Sci U S A*, 90(21), 9998-10002.  
908 doi:10.1073/pnas.90.21.9998
- 909 McGuire, L. M., Telian, G., Laboy-Juarez, K. J., Miyashita, T., Lee, D. J., Smith, K. A., &  
910 Feldman, D. E. (2016). Short Time-Scale Sensory Coding in S1 during Discrimination of  
911 Whisker Vibrotactile Sequences. *PLoS Biol*, 14(8), e1002549.  
912 doi:10.1371/journal.pbio.1002549
- 913 Minamisawa, G., Kwon, S. E., Chevee, M., Brown, S. P., & O'Connor, D. H. (2018). A  
914 Non-canonical Feedback Circuit for Rapid Interactions between Somatosensory Cortices.  
915 *Cell Rep*, 23(9), 2718-2731 e2716. doi:10.1016/j.celrep.2018.04.115
- 916 Naka, A., Veit, J., Shababo, B., Chance, R. K., Risso, D., Stafford, D., . . . Adesnik, H.  
917 (2019). Complementary networks of cortical somatostatin interneurons enforce layer  
918 specific control. *ELife*, 18. doi: 10.7554/eLife.43696
- 919 Oh, S. W., Harris, J. A., Ng, L., Winslow, B., Cain, N., Mihalas, S., . . . Zeng, H. (2014). A  
920 mesoscale connectome of the mouse brain. *Nature*, 508(7495), 207-214.  
921 doi:10.1038/nature13186
- 922 Olavarria, J. F., & Van Sluyters, R. C. (1995). Comparison of the patterns of callosal  
923 connections in lateral parietal cortex of the rat, mouse and hamster. *Anat Embryol (Berl)*,  
924 191(3), 239-242. doi:10.1007/BF00187822
- 925 Pachitariu, M., Steinmetz, N., Kadir, S., Carandini, M., & Harris, K. (2016). Fast and

926 accurate spike sorting of high-channel count probes with KiloSort. *Advances in Neural*  
927 *Information Processing Systems* 29.

928 Palmer, L. M., Schulz, J. M., Murphy, S. C., Ledergerber, D., Murayama, M., & Larkum,  
929 M. E. (2012). The cellular basis of GABA(B)-mediated interhemispheric inhibition.  
930 *Science*, 335(6071), 989-993. doi:10.1126/science.1217276

931 Petreanu, L., Huber, D., Sobczyk, A., & Svoboda, K. (2007). Channelrhodopsin-2-  
932 assisted circuit mapping of long-range callosal projections. *Nat Neurosci*, 10(5), 663-668.  
933 doi:10.1038/nn1891

934 Picard, N., Lepore, F., Ptito, M., & Guillemot, J. P. (1990). Bilateral interaction in the  
935 second somatosensory area (SII) of the cat and contribution of the corpus callosum. *Brain*  
936 *Res*, 536(1-2), 97-104. doi:10.1016/0006-8993(90)90013-2

937 Pidoux, B., & Verley, R. (1979). Projections on the cortical somatic I barrel subfield from  
938 ipsilateral vibrissae in adult rodents. *Electroencephalogr Clin Neurophysiol*, 46(6), 715-  
939 726. doi:10.1016/0013-4694(79)90111-1

940 Pinto, D. J., Brumberg, J. C., & Simons, D. J. (2000). Circuit dynamics and coding  
941 strategies in rodent somatosensory cortex. *J Neurophysiol*, 83(3), 1158-1166.  
942 doi:10.1152/jn.2000.83.3.1158

943 Plomp, G., Michel, C. M., & Quairiaux, C. (2017). Systematic population spike delays  
944 across cortical layers within and between primary sensory areas. *Sci Rep*, 7(1), 15267.  
945 doi:10.1038/s41598-017-15611-2

946 Plomp, G., Quairiaux, C., Kiss, J. Z., Astolfi, L., & Michel, C. M. (2014). Dynamic  
947 connectivity among cortical layers in local and large-scale sensory processing. *Eur J*  
948 *Neurosci*, 40(8), 3215-3223. doi:10.1111/ejn.12687



- 949 Pluta, S., Naka, A., Veit, J., Telian, G., Yao, L., Hakim, R., . . . Adesnik, H. (2015). A direct  
950 translaminar inhibitory circuit tunes cortical output. *Nat Neurosci*, 18(11), 1631-1640.  
951 doi:10.1038/nn.4123
- 952 Ranjbar-Slamloo, Y., & Arabzadeh, E. (2017). High-velocity stimulation evokes "dense"  
953 population response in layer 2/3 vibrissal cortex. *J Neurophysiol*, 117(3), 1218-1228.  
954 doi:10.1152/jn.00815.2016
- 955 Ranjbar-Slamloo, Y., & Arabzadeh, E. (2019). Diverse tuning underlies sparse activity in  
956 layer 2/3 vibrissal cortex of awake mice. *J Physiol*, 597(10), 2803-2817.  
957 doi:10.1113/JP277506
- 958 Reed, J. L., Qi, H. X., & Kaas, J. H. (2011). Spatiotemporal properties of neuron response  
959 suppression in owl monkey primary somatosensory cortex when stimuli are presented to  
960 both hands. *J Neurosci*, 31(10), 3589-3601. doi:10.1523/JNEUROSCI.4310-10.2011
- 961 Rock, C., & Apicella, A. J. (2015). Callosal projections drive neuronal-specific responses  
962 in the mouse auditory cortex. *J Neurosci*, 35(17), 6703-6713.  
963 doi:10.1523/JNEUROSCI.5049-14.2015
- 964 Romo, R., Hernandez, A., Zainos, A., Lemus, L., & Brody, C. D. (2002). Neuronal  
965 correlates of decision-making in secondary somatosensory cortex. *Nat Neurosci*, 5(11),  
966 1217-1225. doi:10.1038/nn950
- 967 Rossant, C., & Harris, K. D. (2013). Hardware-accelerated interactive data visualization  
968 for neuroscience in Python. *Frontiers in Neuroinformatics*, 7:36. doi:  
969 10.3389/fninf.2013.00036.
- 970 Rudy, B., Fishell, G., Lee, S., & Hjerling-Leffler, J. (2011). Three groups of interneurons  
971 account for nearly 100% of neocortical GABAergic neurons. *Dev Neurobiol*, 71(1), 45-61.

972 doi:10.1002/dneu.20853

973 Sederberg, A. J., Pala, A., Zheng, H. J. V., He, B. J., & Stanley, G. B. (2019). State-aware  
974 detection of sensory stimuli in the cortex of the awake mouse. *PLoS Comput Biol*, 15(5),  
975 e1006716. doi:10.1371/journal.pcbi.1006716

976 Shuler, M. G., Krupa, D. J., & Nicolelis, M. A. (2001). Bilateral integration of whisker  
977 information in the primary somatosensory cortex of rats. *J Neurosci*, 21(14), 5251-5261.  
978 doi: 10.1523/JNEUROSCI.21-14-05251.2001.

979 Simons, D. J. (1978). Response properties of vibrissa units in rat SI somatosensory  
980 neocortex. *J Neurophysiol*, 41(3), 798-820. doi:10.1152/jn.1978.41.3.798

981 Sloper, J. J., & Powell, T. P. (1979). An experimental electron microscopic study of  
982 afferent connections to the primate motor and somatic sensory cortices. *Philos Trans R*  
983 *Soc Lond B Biol Sci*, 285(1006), 199-226. doi:10.1098/rstb.1979.0005

984 Sofroniew, N. J., Vlasov, Y. A., Hires, S. A., Freeman, J., & Svoboda, K. (2015). Neural  
985 coding in barrel cortex during whisker-guided locomotion. *Elife*, 4.  
986 doi:10.7554/eLife.12559

987 Smith, R. L. (1973). The ascending fiber projections from the principal sensory trigeminal  
988 nucleus in the rat. *J Comp Neurol*, 148(4), 423-445. doi: 10.1002/cne.901480403.

989 Song, C., Piscopo, D. M., Niell, C. M., & Knopfel, T. (2018). Cortical signatures of wakeful  
990 somatosensory processing. *Sci Rep*, 8(1), 11977. doi:10.1038/s41598-018-30422-9

991 Stamm, J. S., & Sperry, R. W. (1957). Function of corpus callosum in contralateral transfer  
992 of somesthetic discrimination in cats. *J Comp Physiol Psychol*, 50(2), 138-143.  
993 doi:10.1037/h0039810

- 994 Tame, L., Braun, C., Holmes, N. P., Farne, A., & Pavani, F. (2016). Bilateral  
995 representations of touch in the primary somatosensory cortex. *Cogn Neuropsychol*, 33(1-  
996 2), 48-66. doi:10.1080/02643294.2016.1159547
- 997 Taoka, M., Toda, T., Hihara, S., Tanaka, M., Iriki, A., & Iwamura, Y. (2016). A systematic  
998 analysis of neurons with large somatosensory receptive fields covering multiple body  
999 regions in the secondary somatosensory area of macaque monkeys. *J Neurophysiol*,  
1000 116(5), 2152-2162. doi:10.1152/jn.00241.2016
- 1001 Tommerdahl, M., Simons, S. B., Chiu, J. S., Tannan, V., Favorov, O., & Whitsel, B. (2005).  
1002 Response of SII cortex to ipsilateral, contralateral and bilateral flutter stimulation in the  
1003 cat. *BMC Neurosci*, 6, 11. doi:10.1186/1471-2202-6-11
- 1004 Waite, P. M. E. (1973). Somatotopic organization of vibrissal responses in the ventro-  
1005 basal complex of the rat thalamus. *J Physiol*, 228(2), 527-540. doi:  
1006 10.1113/jphysiol.1973.sp010098.
- 1007 Wang, Q., Webber, R. M., & Stanley, G. B. (2010). Thalamic synchrony and the adaptive  
1008 gating of information flow to cortex. *Nat Neurosci*, 13(12), 1534-1541.  
1009 doi:10.1038/nn.2670
- 1010 White, E. L., & DeAmicis, R. A. (1977). Afferent and efferent projections of the region in  
1011 mouse SmL cortex which contains the posteromedial barrel subfield. *J Comp Neurol*,  
1012 175(4), 455-482. doi:10.1002/cne.901750405
- 1013 Wiest, M. C., Bentley, N., & Nicolelis, M. A. (2005). Heterogeneous integration of bilateral  
1014 whisker signals by neurons in primary somatosensory cortex of awake rats. *J*  
1015 *Neurophysiol*, 93(5), 2966-2973. doi:10.1152/jn.00556.2004
- 1016 Wilent, W. B., & Contreras, D. (2004). Synaptic responses to whisker deflections in rat

- 1017 barrel cortex as a function of cortical layer and stimulus intensity. *J Neurosci*, 24(16),  
1018 3985-3998. doi:10.1523/JNEUROSCI.5782-03.2004
- 1019 Wilks, S. J., Richardson-Burns, S. M., Hendricks, J. L., Martin, D. C., & Otto, K. J. (2009).  
1020 Poly(3,4-ethylenedioxythiophene) as a Micro-Neural Interface Material for  
1021 Electrostimulation. *Front Neuroeng*, 2, 7. doi:10.3389/neuro.16.007.2009
- 1022 Wise, S. P. (1975). The laminar organization of certain afferent and efferent fiber systems  
1023 in the rat somatosensory cortex. *Brain Res*, 90(1), 139-142. doi:10.1016/0006-  
1024 8993(75)90688-5
- 1025 Wise, S. P., & Jones, E. G. (1976). The organization and postnatal development of the  
1026 commissural projection of the rat somatic sensory cortex. *J Comp Neurol*, 168(3), 313-  
1027 343. doi:10.1002/cne.901680302
- 1028 Wong-Riley, M. T., & Welt, C. (1980). Histochemical changes in cytochrome oxidase of  
1029 cortical barrels after vibrissal removal in neonatal and adult mice. *Proc Natl Acad Sci U S*  
1030 *A*, 77(4), 2333-2337. doi:10.1073/pnas.77.4.2333
- 1031 Yamashita, T., Pala, A., Pedrido, L., Kremer, Y., Welker, E., & Petersen, C. C. (2013).  
1032 Membrane potential dynamics of neocortical projection neurons driving target-specific  
1033 signals. *Neuron*, 80(6), 1477-1490. doi:10.1016/j.neuron.2013.10.059
- 1034 Zohary, E., Shadlen, M. N., & Newsome, W. T. (1994). Correlated neuronal discharge  
1035 rate and its implications for psychophysical performance. *Nature*, 370(6485), 140-143.  
1036 doi: 10.1038/370140a0.
- 1037 Zuo, Y., Safaai, H., Notaro, G., Mazzoni, A., Panzeri, S., & Diamond, M. E. (2015).  
1038 Complementary contributions of spike timing and spike rate to perceptual decisions in rat  
1039 S1 and S2 cortex. *Curr Biol*, 25(3), 357-363. doi:10.1016/j.cub.2014.11.065
